# Supplementary material for: Evaluating hearing performance with cochlear implants within the same patient using daily randomization and imaging-based fitting - The ELEPHANT study
Source: PubMed Central journal article supplement (PMC7310427; doi:10.1186/s13063-020-04469-x), 2020-06-23
Supplement: 13063_2020_4469_MOESM2_ESM.pdf [file 13063_2020_4469_MOESM2_ESM.pdf]

# Case Report Form (CRF)

Study number: METC 18-028

Study title: ELEctric Place-pitched Hearing Achieves Natural Tonotopy (ELEPHANT)

Study site: Maastricht MUMC +

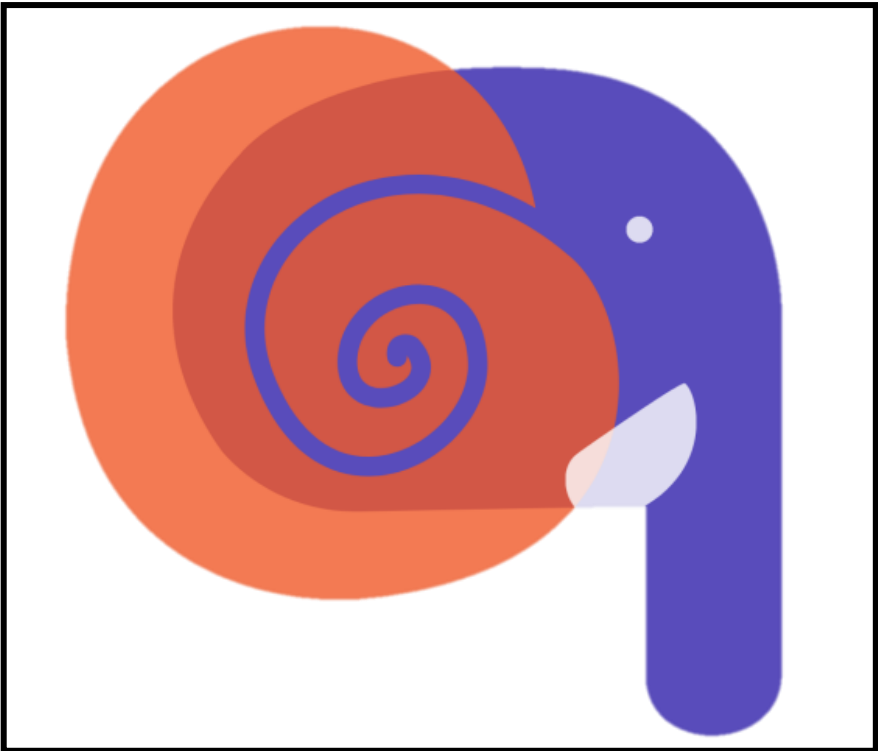

**ELEPHANT-study**

## CRF Instructions

1. Verify if informed consent form (separate IC document) is signed by both patient and researcher before inclusion starts. The IC form should be locked and stored separate from this CRF. A signed copy of the IC form is given to the patient. An IC note is made to the patient's electronic medical dossier (SAP).
2. All questions in this CRF should be filled in, preferably with black ink.
3. The patient identification number (defined at p. 4) should be noted on every page of the CRF.
4. If data needs to be corrected, then these revisions should be provided with addition of a name and signature of the researcher. Corrected data should be crossed through but needs to stay readable. No correction fluid should be used.
5. When a test condition has been assessed, the corresponding box should be checked by an X.
6. If a test condition is not applicable, and thereby not assessed, the corresponding box should be crossed out.
7. If a test condition is applicable, but was not assessed, the corresponding box should be checked by an O.
8. Dates should be filled in using the format date/month/year: DD/MM/(20)YY

## Glossary

### CI: cochlear implant

- Standard program:  
frequency-allocation table is mapped conventionally, following clinical routine, based on a one-size fits-all principle, programmed on either processor  $\Delta$  or  $\bigcirc$ .
- Natural program:  
frequency-allocation table is mapped experimentally, following individual natural tonotopy, based on imaging data, programmed on either processor  $\Delta$  or  $\bigcirc$ .
- Preferred program :  
either standard or natural map, as decided by shared decision making during visit F14 (week 26).

### HA: hearing aid

- Bimodal fit:  
settings that are programmed conventionally, following clinical gain rules based on patient's audiogram.
- Loudness fit:  
settings that are programmed experimentally, based on the acoustic loudness growth between threshold (T) and maximum (M) level.

### Overall

- Clinical program:  
CI frequency-allocation table or HA settings that are mapped according to the obtained preferences during the study period, but programmed with clinical software.

SUBJECT ID: \_\_\_\_\_ SEEN BY MONITOR: \_\_\_\_\_ DATE: \_\_\_\_/\_\_\_\_/\_\_\_\_

**INFORMED CONSENT**

**Subject ID:**

|   |   |  |  |
|---|---|--|--|
| E | P |  |  |
|---|---|--|--|

**Year of birth:**

|  |  |  |  |
|--|--|--|--|
|  |  |  |  |
|--|--|--|--|

**Date** of subject's written informed consent: ...../...../.....

| Inclusion Criteria                                                                                                 | Yes                      | No*                      |
|--------------------------------------------------------------------------------------------------------------------|--------------------------|--------------------------|
| adult (>18 years of age) and meeting the Dutch standard CI criteria                                                | <input type="checkbox"/> | <input type="checkbox"/> |
| proficient speaker of Dutch language                                                                               | <input type="checkbox"/> | <input type="checkbox"/> |
| post-lingual onset of profound deafness (> 4 years of age)                                                         | <input type="checkbox"/> | <input type="checkbox"/> |
| subject receives an Advanced Bionics HiRes Ultra implant with Midscale electrode and an Advanced Bionics processor | <input type="checkbox"/> | <input type="checkbox"/> |
| prepared to use study specific hearing aid (Phonak) for the duration of the study (in case of contralateral HA)    | <input type="checkbox"/> | <input type="checkbox"/> |
| rehabilitation at MUMC+ for the first year after surgery regarding CI as well as HA                                | <input type="checkbox"/> | <input type="checkbox"/> |
| active participation in trial related procedures such as daily randomization and regular testing                   | <input type="checkbox"/> | <input type="checkbox"/> |
| agreed to participate in this part of the study (by informed consent)                                              | <input type="checkbox"/> | <input type="checkbox"/> |

\*If any inclusion criteria are ticked no then the patient is not eligible for the study.

| Exclusion Criteria                                                                                                                                       | Yes*                     | No                       |
|----------------------------------------------------------------------------------------------------------------------------------------------------------|--------------------------|--------------------------|
| physical or non-physical contraindications for MRI or CT imaging                                                                                         | <input type="checkbox"/> | <input type="checkbox"/> |
| additional disabilities that may prevent active participation**                                                                                          | <input type="checkbox"/> | <input type="checkbox"/> |
| cochlear or neural abnormalities that could affect outcome measures and/or compromise the placement of the electrode array as assessed by the CI surgeon | <input type="checkbox"/> | <input type="checkbox"/> |
| active participation in another prospective clinical trial                                                                                               | <input type="checkbox"/> | <input type="checkbox"/> |
| pregnancy                                                                                                                                                | <input type="checkbox"/> | <input type="checkbox"/> |
| requirement of electric-acoustic activation prior to the first year follow-up                                                                            | <input type="checkbox"/> | <input type="checkbox"/> |
| having received a cochlear implant earlier (e.g. explantation or bilateral implantation)                                                                 | <input type="checkbox"/> | <input type="checkbox"/> |

\* If any exclusion criteria are ticked yes then the patient is not eligible for the study.

\*\* If there are indications that the mental abilities to comply with the study procedures are insufficient, additional screening will be performed with the Mini-Mental State Examination. Patients will be excluded from the study when the resulting score is lower than 24;

SUBJECT ID: \_\_\_\_\_ SEEN BY MONITOR: \_\_\_\_\_ DATE: \_\_\_\_/\_\_\_\_/\_\_\_\_

**BASELINE DATA**

**LEFT hearing situation**

- Etiology of deafness
- Onset of profound deafness (age)
- Current HA-use?
  - If yes, since age
  - If yes, brand and type device
  - If yes, age current device
  - If yes, frequency of usage

|                                              |           |
|----------------------------------------------|-----------|
| <input type="checkbox"/> Unknown/Progressive |           |
| <input type="checkbox"/> Other:              |           |
|                                              |           |
| Yes / No                                     |           |
|                                              |           |
|                                              |           |
| years                                        |           |
| < 5 / 5-10 / > 10                            | hours/day |

**RIGHT hearing situation**

- Etiology of deafness
- Onset of profound deafness (age)
- Current HA-use?
  - If yes, since age
  - If yes, brand and type device
  - If yes, age current device
  - If yes, frequency of usage

|                                              |           |
|----------------------------------------------|-----------|
| <input type="checkbox"/> Unknown/Progressive |           |
| <input type="checkbox"/> Other:              |           |
|                                              |           |
| Yes / No                                     |           |
|                                              |           |
|                                              |           |
| years                                        |           |
| < 5 / 5-10 / > 10                            | hours/day |

**Tinnitus Questionnaire (TQ)**

- Total score
- Grade

|               |
|---------------|
|               |
| 1 / 2 / 3 / 4 |

**Overall**

- Education level
- Native language
  - If other, Dutch language level
- Current use of medication
  - If yes, type, dose and indication

|                                                   |
|---------------------------------------------------|
| <input type="checkbox"/> None                     |
| <input type="checkbox"/> Primary school           |
| <input type="checkbox"/> Special education        |
| <input type="checkbox"/> LBO/LTS                  |
| <input type="checkbox"/> ULO/MBO/MAVO             |
| <input type="checkbox"/> HAVO/VWO                 |
| <input type="checkbox"/> HBO/HEAO/HTS             |
| <input type="checkbox"/> Higher science education |
| Dutch / other:                                    |
| Very good / good / average / limited              |
| Yes / No                                          |
|                                                   |

# 1. Pre-fit phase

## 1.1. P1/P2: Candidacy visits (and pre-OP, if applicable)

### 1.1.1. IMAGING

CT performed?  Yes, date:   No

MRI performed?  Yes, date:   No

Remarks

### 1.1.2. TONE AUDIOMETRY

|            | Unaided                  |                          | HA                       |                          | Unaided retest           |                          |
|------------|--------------------------|--------------------------|--------------------------|--------------------------|--------------------------|--------------------------|
| Date       | ...../...../.....        |                          | ...../...../.....        |                          | ...../...../.....        |                          |
| Ear        | L                        | R                        | L                        | R                        | L                        | R                        |
| Completed? | <input type="checkbox"/> | <input type="checkbox"/> | <input type="checkbox"/> | <input type="checkbox"/> | <input type="checkbox"/> | <input type="checkbox"/> |

Remarks

### 1.1.3. SPEECH AUDIOMETRY

|            | Unaided                  |                          | HA                       |                          | Unaided retest           |                          |
|------------|--------------------------|--------------------------|--------------------------|--------------------------|--------------------------|--------------------------|
| Date       | ...../...../.....        |                          | ...../...../.....        |                          | ...../...../.....        |                          |
| Ear        | L                        | R                        | L                        | R                        | L                        | R                        |
| Completed? | <input type="checkbox"/> | <input type="checkbox"/> | <input type="checkbox"/> | <input type="checkbox"/> | <input type="checkbox"/> | <input type="checkbox"/> |

Remarks

### 1.1.4. REM

REM performed?  Yes, date:   No, because.....

HA refit necessary?  No  Yes, refit on date:

Retest after refit?  No  Yes, retest on date:

SUBJECT ID: \_\_\_\_\_ SEEN BY MONITOR: \_\_\_\_\_ DATE: \_\_\_\_/\_\_\_\_/\_\_\_\_

|            |                          |                          |                          |                          |
|------------|--------------------------|--------------------------|--------------------------|--------------------------|
|            | Tone audio               |                          | Speech audio             |                          |
|            | HA                       |                          | HA                       |                          |
| Ear        | L                        | R                        | L                        | R                        |
| Completed? | <input type="checkbox"/> | <input type="checkbox"/> | <input type="checkbox"/> | <input type="checkbox"/> |

**Remarks**

**1.1.5. EARMOULD**

Adequate earmould available for contralateral ear?  Yes, date:   No, describe in remarks

If not, prescription given?  Yes, date:   No

**Remarks**

**1.1.6. QUESTIONNAIRES**

|               | Given to subject         | Returned and checked     |
|---------------|--------------------------|--------------------------|
| Date          | ...../...../.....        | ...../...../.....        |
| SSQ-12 (I07)  | <input type="checkbox"/> | <input type="checkbox"/> |
| HUI-3 (I08)   | <input type="checkbox"/> | <input type="checkbox"/> |
| ICECAP-A (09) | <input type="checkbox"/> | <input type="checkbox"/> |

**Remarks**

**1.1.7. HARDWARE**

Patient choice for CI color?  Silver gray  Chestnut  
 Sand beige  Velvet black  
 Alpine white

- Patient choice for HA color?  Silver gray  Chestnut  
 Sand beige  Velvet black  
 Graphite grey

**Remarks**

\_\_\_\_\_

**1.1.8. PROTOCOL DEVIATIONS**

- Were there any protocol deviations?  Yes  No

**Remarks**

\_\_\_\_\_

**General remarks**

\_\_\_\_\_

**1.2. P3: Visit OR**

Date:

...../...../.....

**1.2.1. IMPLANTATION REPORT**

Implantation report (I01) completed and signed by surgeon?  Yes  No

Intraoperative measurements performed?  Yes  No

Particularities that will influence CI fitting?  No  Yes, describe in remarks and note on CRF in section 2.1.1 and 2.2.2!

**Remarks**

.....

**1.2.2. ADVERSE EVENTS**

Checked and acted on adverse events?  Yes  No

**Remarks**

.....

**General remarks**

.....



**1.3. P4: Visit CBCT**

Date:

**1.3.1. VISIT ENT**

Any particularities?  No  Yes, describe:  
.....  
.....

**1.3.2. CBCT SCAN**

CBCT scan performed?  Yes  No, because..... → EARLY TERMINATION!  
Scan quality adequate?  Yes  No, new scan performed on ...../...../.....  
Particularities that will influence CI fitting?  No  Yes, describe in remarks and note on CRF in section 2.1.1 and 2.2.2!

**Remarks**

.....  
.....

**1.3.3. EARMOULD**

Adequate earmould available for contralateral ear?  
 Yes  No, describe steps to be taken before visit F1:  
.....  
.....

**1.3.4. PROTOCOL DEVIATIONS**

Were there any protocol deviations?  Yes  No

**Remarks**

.....  
.....

**1.3.5. DEVICE DEFICIENCIES**

Were there any device deficiencies?  Yes  No

**Remarks**

.....  
.....

**1.3.6. ADVERSE EVENTS**

Checked and acted on adverse events?  Yes  No

**Remarks**

.....

SUBJECT ID: \_\_\_\_\_ SEEN BY MONITOR: \_\_\_\_\_ DATE: \_\_\_\_/\_\_\_\_/\_\_\_\_

**General remarks**

\_\_\_\_\_

## 2. First phase

### 2.1. Pre-fitting preparation

#### 2.1.1. MAPPING

Mapping performed?  Yes, date:   No

Electrodes extracochlear?  No  Yes, el.....

Electrodes folded over in tip?  No  Yes, el.....

Impedances within normal range ( $1.0\text{ k}\Omega \leq \text{value} \leq 30.0\text{ k}\Omega$ )?

|            |   |   |   |   |   |   |   |   |   |    |    |    |    |    |    |    |
|------------|---|---|---|---|---|---|---|---|---|----|----|----|----|----|----|----|
| El number  | 1 | 2 | 3 | 4 | 5 | 6 | 7 | 8 | 9 | 10 | 11 | 12 | 13 | 14 | 15 | 16 |
| Y(es)/N(o) |   |   |   |   |   |   |   |   |   |    |    |    |    |    |    |    |

Electrodes to be turned off (based on impedances)?  No  Yes, el.....

→ To be applied in standard AND natural map!

→ Note on section 2.2.2 and first fitting form!

Number of channels mapped < 8598 Hz (excluding phantom)?   $\geq 8$    $< 8$  → EARLY TERMINATION!

**Remarks**

#### 2.1.2. DAILY RANDOMIZATION

Randomization schedule created?  Yes, date:   No

Any particularities?  No  Yes, describe:

.....

.....

**Remarks**

#### 2.1.3. TEST RANDOMIZATION

Randomization of test conditions and word lists performed?  Yes, date:   No

Any particularities?  No  Yes, describe:

.....

SUBJECT ID: \_\_\_\_\_ SEEN BY MONITOR: \_\_\_\_\_ DATE: \_\_\_\_/\_\_\_\_/\_\_\_\_

.....  
**Remarks**  
 \_\_\_\_\_  
 \_\_\_\_\_

**2.1.4. HARDWARE**

- Patient kit ready?  Yes, date: ...../...../.....  No
- Patient processor stored safely?  Yes, date: ...../...../.....  No
- Contralateral earmould available?  Yes, date: ...../...../.....  No

|               | CI                                                          |                                                         | HA                  |
|---------------|-------------------------------------------------------------|---------------------------------------------------------|---------------------|
| Device        | Research CI Naida Q70 <span style="color: purple;">△</span> | Research Naida Q70 <span style="color: green;">○</span> | Research Naida Link |
| Serial number | .....                                                       | .....                                                   | .....               |
| Color         | .....                                                       | .....                                                   | .....               |

**Remarks**  
 \_\_\_\_\_  
 \_\_\_\_\_

**2.1.5. SOFTWARE**

- Measurement template ready in BEPS+?  Yes, date: ...../...../.....  No
- Natural template ready in BEPS+?  Yes, date: ...../...../.....  No
- Audiogram ready in Phonak Target?  Yes, date: ...../...../.....  No

**Remarks**  
 \_\_\_\_\_  
 \_\_\_\_\_

**2.2. Visit F1 (wk 0)**

Date:

Bimodal user:  Yes  No, because.....

**2.2.1. TONE AUDIOMETRY**

|            |                          |                          |
|------------|--------------------------|--------------------------|
|            | Unaided                  |                          |
| Ear        | L                        | R                        |
| Completed? | <input type="checkbox"/> | <input type="checkbox"/> |

Decided to start with EAS?  No  Yes → EARLY TERMINATION!

**Remarks**

.....

**2.2.2. SPEECH AUDIOMETRY**

|            |                          |                          |
|------------|--------------------------|--------------------------|
|            | Unaided                  |                          |
| Ear        | L                        | R                        |
| Completed? | <input type="checkbox"/> | <input type="checkbox"/> |

**Remarks**

.....

**2.2.3. FITTING**

Particularities to be taken into account during fitting:

from impedance measurements?  No  Yes, .....

from ECAP measurements?  No  Yes, .....

from CBCT scan?  No  Yes, .....

Fitting form (i02) completed?  No  Yes

Particularities relevant for next fitting?  No  Yes, see fitting form.

**Remarks**

.....

**BREAK**

**2.2.4. SPEECH AUDIOMETRY**

|                | Test                     |                          |                          | Retest                   |                          |                          | Test                     |                          |                          | Retest                   |                          |                          |                          |                          |                          |
|----------------|--------------------------|--------------------------|--------------------------|--------------------------|--------------------------|--------------------------|--------------------------|--------------------------|--------------------------|--------------------------|--------------------------|--------------------------|--------------------------|--------------------------|--------------------------|
| Listening      | CI                       |                          |                          | CI                       |                          |                          | CI                       |                          |                          | HA                       |                          |                          |                          |                          |                          |
| CI processor   | △                        |                          |                          | △                        |                          |                          | ○                        |                          |                          | ○                        |                          |                          |                          |                          |                          |
| CI program     | .....                    |                          |                          |                          |                          |                          | .....                    |                          |                          |                          |                          |                          |                          |                          |                          |
| HA program     | HA turned off            |                          |                          |                          |                          |                          |                          |                          |                          | Bimodal fit              |                          |                          |                          |                          |                          |
| Level (dB SPL) | 75                       | 65                       | 55                       | 65                       | 75                       | 65                       | 55                       | 65                       | 75                       | 65                       | 55                       | 65                       | 75                       | 65                       | 55                       |
| Completed?     | <input type="checkbox"/> | <input type="checkbox"/> | <input type="checkbox"/> | <input type="checkbox"/> | <input type="checkbox"/> | <input type="checkbox"/> | <input type="checkbox"/> | <input type="checkbox"/> | <input type="checkbox"/> | <input type="checkbox"/> | <input type="checkbox"/> | <input type="checkbox"/> | <input type="checkbox"/> | <input type="checkbox"/> | <input type="checkbox"/> |

**Remarks**

Additional testing performed with number lists

**2.2.5. MATRIX IN QUIET**

|               | Practice                 |                          | Test                     |                          | Retest                   |                          | Test                     |                          | Retest                   |                          |
|---------------|--------------------------|--------------------------|--------------------------|--------------------------|--------------------------|--------------------------|--------------------------|--------------------------|--------------------------|--------------------------|
| Listening     | CI                       |                          | CI                       |                          | CI                       |                          | CI                       |                          | CI                       |                          |
| CI processor  | △ / ○                    |                          | △                        |                          | △                        |                          | ○                        |                          | ○                        |                          |
| CI program    | .....                    |                          | .....                    |                          |                          |                          | .....                    |                          |                          |                          |
| HA program    | HA turned off            |                          |                          |                          |                          |                          |                          |                          |                          |                          |
| N sentences   | 10                       | 10                       | 10                       | 10                       | 10                       | 10                       | 10                       | 10                       | 10                       | 10                       |
| Word list nr. | .....                    |                          | .....                    |                          | .....                    |                          | .....                    |                          | .....                    |                          |
| Order         | 1                        |                          | .....                    |                          | .....                    |                          | .....                    |                          | .....                    |                          |
| Completed?    | <input type="checkbox"/> | <input type="checkbox"/> | <input type="checkbox"/> | <input type="checkbox"/> | <input type="checkbox"/> | <input type="checkbox"/> | <input type="checkbox"/> | <input type="checkbox"/> | <input type="checkbox"/> | <input type="checkbox"/> |

**Remarks**

Could not be performed (too difficult for patient)

**2.2.6. MATRIX IN NOISE**

|               | Practice                 |                          | Test                     | Retest                   | Test                     | Retest                   |
|---------------|--------------------------|--------------------------|--------------------------|--------------------------|--------------------------|--------------------------|
| Listening     | CI                       |                          | CI                       | CI                       | CI                       | CI                       |
| CI processor  | △ / ○                    |                          | △                        | △                        | ○                        | ○                        |
| CI program    | .....                    |                          | .....                    |                          | .....                    |                          |
| HA program    | HA turned off            |                          |                          |                          |                          |                          |
| N sentences   | 10                       | 10                       | 10                       | 10                       | 10                       | 10                       |
| Word list nr. | .....                    | .....                    | .....                    | .....                    | .....                    | .....                    |
| Order         | 1                        |                          | .....                    | .....                    | .....                    | .....                    |
| Completed?    | <input type="checkbox"/> | <input type="checkbox"/> | <input type="checkbox"/> | <input type="checkbox"/> | <input type="checkbox"/> | <input type="checkbox"/> |

**Remarks**

Not performed, due to matrix in quiet SRT score = < 50%

**2.2.7. PREFERENCE SCALES**

Preference scales (i03) completed?  Yes  No

**2.2.8. DATA MANAGEMENT CHECK-UP**

Digital data complete and correctly archived on network drive?  Yes  No

→ If no, describe steps to be taken:

.....

.....

Source documents correctly archived in filing cabinet?  Yes  No

→ If no, describe steps to be taken:

.....

.....

**Remarks**

.....

**2.2.9. PROTOCOL DEVIATIONS**

Were there any protocol deviations?  Yes  No

**Remarks**

.....

SUBJECT ID: \_\_\_\_\_ SEEN BY MONITOR: \_\_\_\_\_ DATE: \_\_\_\_/\_\_\_\_/\_\_\_\_

\_\_\_\_\_

**2.2.10. DEVICE DEFICIENCIES**

Were there any device deficiencies?  Yes  No

**Remarks**

\_\_\_\_\_

**2.2.11. ADVERSE EVENTS**

Checked and acted on adverse events?  Yes  No

Any signs of tinnitus?  Yes  No

If yes, on what side(s)  Left  Right

If yes, to what extent (VAS 0-10)? Left: ..... Right: .....

Any signs of vertigo?  Yes  No

Any signs of oscillopsia?  Yes  No

**Remarks**

\_\_\_\_\_

**General remarks**

\_\_\_\_\_



**2.3. Visit F2 (week 1)**

Date:

Bimodal user:  Yes  No, because.....

**2.3.1. PREFERENCE SCALES**

Preference scales (i03) completed?  Yes  No

**2.3.2. FITTING**

Particularities from previous fitting to be taken into account?  No  Yes, see fitting form

Fitting form (i02) completed?  Yes  No

Particularities relevant for next fitting?  No  Yes, note on fitting form

Compliance forms completed?  Yes  No

ECAP completed?  Yes  No

**Remarks**

.....

**2.3.3. SPEECH THERAPY**

Particularities from speech therapy to be taken into account?  No  Yes, note here

**Remarks**

.....

**BREAK**

**2.3.4. SPEECH AUDIOMETRY**

|                | Test                     |                          |                          | Retest                   |                          | Test                     |                          |                          | Retest |
|----------------|--------------------------|--------------------------|--------------------------|--------------------------|--------------------------|--------------------------|--------------------------|--------------------------|--------|
| Listening      | CI                       |                          |                          | CI                       |                          | CI                       |                          |                          | CI     |
| CI processor   | △                        |                          |                          | △                        |                          | ○                        |                          |                          | ○      |
| CI program     | .....                    |                          |                          |                          | .....                    |                          |                          |                          |        |
| HA program     | HA turned off            |                          |                          |                          |                          |                          |                          |                          |        |
| Level (dB SPL) | 75                       | 65                       | 55                       | 65                       | 75                       | 65                       | 55                       | 65                       |        |
| Completed?     | <input type="checkbox"/> | <input type="checkbox"/> | <input type="checkbox"/> | <input type="checkbox"/> | <input type="checkbox"/> | <input type="checkbox"/> | <input type="checkbox"/> | <input type="checkbox"/> |        |

**Remarks**

Additional testing performed with number lists

SUBJECT ID: \_\_\_\_\_ SEEN BY MONITOR: \_\_\_\_\_ DATE: \_\_\_\_/\_\_\_\_/\_\_\_\_

**2.3.5. MATRIX IN QUIET**

|               | Practice                 |                          | Test                     | Retest                   | Test                     | Retest                   |
|---------------|--------------------------|--------------------------|--------------------------|--------------------------|--------------------------|--------------------------|
| Listening     | CI                       |                          | CI                       | CI                       | CI                       | CI                       |
| CI processor  | △ / ○                    |                          | △                        | △                        | ○                        | ○                        |
| CI program    | .....                    |                          | .....                    |                          | .....                    |                          |
| HA program    | HA turned off            |                          |                          |                          |                          |                          |
| N sentences   | 10                       | 10                       | 10                       | 10                       | 10                       | 10                       |
| Word list nr. | .....                    | .....                    | .....                    | .....                    | .....                    | .....                    |
| Order         | 1                        |                          | .....                    | .....                    | .....                    | .....                    |
| Completed?    | <input type="checkbox"/> | <input type="checkbox"/> | <input type="checkbox"/> | <input type="checkbox"/> | <input type="checkbox"/> | <input type="checkbox"/> |

**Remarks**

**2.3.6. MATRIX IN NOISE**

|               | Practice                 |                          | Test                     | Retest                   | Test                     | Retest                   |
|---------------|--------------------------|--------------------------|--------------------------|--------------------------|--------------------------|--------------------------|
| Listening     | CI                       |                          | CI                       | CI                       | CI                       | CI                       |
| CI processor  | △ / ○                    |                          | △                        | △                        | ○                        | ○                        |
| CI program    | .....                    |                          | .....                    |                          | .....                    |                          |
| HA program    | HA turned off            |                          |                          |                          |                          |                          |
| N sentences   | 10                       | 10                       | 10                       | 10                       | 10                       | 10                       |
| Word list nr. | .....                    | .....                    | .....                    | .....                    | .....                    | .....                    |
| Order         | 1                        |                          | .....                    | .....                    | .....                    | .....                    |
| Completed?    | <input type="checkbox"/> | <input type="checkbox"/> | <input type="checkbox"/> | <input type="checkbox"/> | <input type="checkbox"/> | <input type="checkbox"/> |

**Remarks**

Not performed, due to matrix in quiet SRT score = < 50%

**2.3.7. PROTOCOL DEVIATIONS**

Were there any protocol deviations?  Yes  No

**Remarks**

SUBJECT ID: \_\_\_\_\_ SEEN BY MONITOR: \_\_\_\_\_ DATE: \_\_\_\_/\_\_\_\_/\_\_\_\_

\_\_\_\_\_

**2.3.8. DEVICE DEFICIENCIES**

Were there any device deficiencies?  Yes  No

**Remarks**

\_\_\_\_\_

**2.3.9. ADVERSE EVENTS**

Checked and acted on adverse events?  Yes  No

**Remarks**

\_\_\_\_\_

**General remarks**

\_\_\_\_\_

ELEPHANT (METC 18-028) Version: 3.2 Name investigator: \_\_\_\_\_ Signature: \_\_\_\_\_

SUBJECT ID: \_\_\_\_\_ SEEN BY MONITOR: \_\_\_\_\_ DATE: \_\_\_\_/\_\_\_\_/\_\_\_\_

**2.4. Visit F3 (week 2)**

Date:

Bimodal user:  Yes  No, because.....

**2.4.1. TONE AUDIOMETRY**

|            | CI                       |                          | HA                       |
|------------|--------------------------|--------------------------|--------------------------|
| Processor  | △                        | ○                        | Bimodal fit              |
| CI program | .....                    | .....                    | CI off                   |
| Completed? | <input type="checkbox"/> | <input type="checkbox"/> | <input type="checkbox"/> |

Remarks

**2.4.2. REM**

Test completed?  No  Yes  
 Changes made to HA settings as a result of REM?  No  Yes, see fitting form

Remarks

**2.4.3. PREFERENCE SCALES**

Preference scales (i03) completed?  Yes  No

**2.4.4. FITTING**

Particularities from previous fitting to be taken into account?  No  Yes, see fitting form  
 Fitting form (i02) completed?  Yes  No  
 Particularities relevant for next fitting?  No  Yes, note on fitting form  
 Compliance forms completed?  Yes  No

Remarks

**2.4.5. SPEECH THERAPY**

Particularities from speech therapy to be taken into account?  No  Yes, note here

Remarks

**BREAK**

SUBJECT ID: \_\_\_\_\_ SEEN BY MONITOR: \_\_\_\_\_ DATE: \_\_\_\_/\_\_\_\_/\_\_\_\_

**2.4.6. QUESTIONNAIRES**

|                                 |                          |                |
|---------------------------------|--------------------------|----------------|
|                                 | Given to subject         | To be returned |
| Date                            | ...../...../.....        | Visit F4       |
| Sound quality descriptors (I11) | <input type="checkbox"/> |                |

**Remarks**

.....

**2.4.7. SPEECH AUDIOMETRY**

|            | Test                     |                          |                          | Retest                   |                          |                          | Test                     |                          |                          | Retest                   |                          |                          |
|------------|--------------------------|--------------------------|--------------------------|--------------------------|--------------------------|--------------------------|--------------------------|--------------------------|--------------------------|--------------------------|--------------------------|--------------------------|
| Listening  | CI                       |                          |                          | CI                       |                          |                          | CI                       |                          |                          | HA                       |                          |                          |
| CI         | △                        |                          |                          | △                        |                          |                          | ○                        |                          |                          | ○                        |                          |                          |
| CI program | .....                    |                          |                          | .....                    |                          |                          | CI turned off            |                          |                          |                          |                          |                          |
| HA program | HA turned off            |                          |                          |                          |                          |                          | Bimodal fit              |                          |                          |                          |                          |                          |
| Level (dB) | 75                       | 65                       | 55                       | 65                       | 75                       | 65                       | 55                       | 65                       | 75                       | 65                       | 55                       | 65                       |
| Completed? | <input type="checkbox"/> | <input type="checkbox"/> | <input type="checkbox"/> | <input type="checkbox"/> | <input type="checkbox"/> | <input type="checkbox"/> | <input type="checkbox"/> | <input type="checkbox"/> | <input type="checkbox"/> | <input type="checkbox"/> | <input type="checkbox"/> | <input type="checkbox"/> |

**Remarks**

Additional testing performed with number lists

**2.4.8. MATRIX IN QUIET**

|               | Practice                 |                          | Test                     |                          | Retest                   |                          | Test                     |                          | Retest                   |                          |
|---------------|--------------------------|--------------------------|--------------------------|--------------------------|--------------------------|--------------------------|--------------------------|--------------------------|--------------------------|--------------------------|
| Listening     | CI                       |                          | CI                       |                          | CI                       |                          | CI                       |                          | CI                       |                          |
| CI processor  | △ / ○                    |                          | △                        |                          | △                        |                          | ○                        |                          | ○                        |                          |
| CI program    | .....                    |                          | .....                    |                          |                          |                          | .....                    |                          |                          |                          |
| HA program    | HA turned off            |                          |                          |                          |                          |                          |                          |                          |                          |                          |
| N sentences   | 10                       | 10                       | 10                       | 10                       | 10                       | 10                       | 10                       | 10                       | 10                       | 10                       |
| Word list nr. | .....                    | .....                    | .....                    | .....                    | .....                    | .....                    | .....                    | .....                    | .....                    | .....                    |
| Order         | 1                        |                          | .....                    | .....                    | .....                    | .....                    | .....                    | .....                    | .....                    | .....                    |
| Completed?    | <input type="checkbox"/> | <input type="checkbox"/> | <input type="checkbox"/> | <input type="checkbox"/> | <input type="checkbox"/> | <input type="checkbox"/> | <input type="checkbox"/> | <input type="checkbox"/> | <input type="checkbox"/> | <input type="checkbox"/> |

**Remarks**

SUBJECT ID: \_\_\_\_\_ SEEN BY MONITOR: \_\_\_\_\_ DATE: \_\_\_\_/\_\_\_\_/\_\_\_\_

**2.4.9. MATRIX IN NOISE**

|               | Practice                 |                          | Test                     | Retest                   | Test                     | Retest                   |
|---------------|--------------------------|--------------------------|--------------------------|--------------------------|--------------------------|--------------------------|
| Listening     | CI                       |                          | CI                       | CI                       | CI                       | CI                       |
| CI processor  | △ / ○                    |                          | △                        | △                        | ○                        | ○                        |
| CI program    | .....                    |                          | .....                    |                          | .....                    |                          |
| HA program    | HA turned off            |                          |                          |                          |                          |                          |
| N sentences   | 10                       | 10                       | 10                       | 10                       | 10                       | 10                       |
| Word list nr. | .....                    | .....                    | .....                    | .....                    | .....                    | .....                    |
| Order         | 1                        |                          | .....                    | .....                    | .....                    | .....                    |
| Completed?    | <input type="checkbox"/> | <input type="checkbox"/> | <input type="checkbox"/> | <input type="checkbox"/> | <input type="checkbox"/> | <input type="checkbox"/> |

**Remarks**

Not performed, due to matrix in quiet SRT score = < 50%

**2.4.10. PROTOCOL DEVIATIONS**

Were there any protocol deviations?  Yes  No

**Remarks**

**2.4.11. DEVICE DEFICIENCIES**

Were there any device deficiencies?  Yes  No

**Remarks**

**2.4.12. ADVERSE EVENTS**

Checked and acted on adverse events?  Yes  No

**Remarks**

**General remarks**

SUBJECT ID: \_\_\_\_\_ SEEN BY MONITOR: \_\_\_\_\_ DATE: \_\_\_\_/\_\_\_\_/\_\_\_\_

ELEPHANT (METC 18-028) Version: 3.2 Name investigator: \_\_\_\_\_ Signature: \_\_\_\_\_

SUBJECT ID: \_\_\_\_\_ SEEN BY MONITOR: \_\_\_\_\_ DATE: \_\_\_\_/\_\_\_\_/\_\_\_\_



**2.5. Visit F4 (week 3)**

Date:

Bimodal user:  Yes  No, because.....

**2.5.1. PREFERENCE SCALES**

Preference scales (i03) completed?  Yes  No

**2.5.2. FITTING**

Particularities from previous fitting to be taken into account?  No  Yes, see fitting form

Fitting form (i02) completed?  Yes  No

Particularities relevant for next fitting?  No  Yes, note on fitting form

Compliance forms completed?  Yes  No

Consequences of CI compliance measurements, based on calculations (fitting form) and cut-off points (Appendix Compliance):

Study continuation  Early termination and transfer to clinical care

**Remarks**

**2.5.3. SPEECH THERAPY**

Particularities from speech therapy to be taken into account?  No  Yes, note here

**Remarks**

**2.5.4. SPEECH AUDIOMETRY**

|                | Test          |    |    | Retest |    |    | Test  |    |    | Retest |    |    | Test          |    | Retest |  |
|----------------|---------------|----|----|--------|----|----|-------|----|----|--------|----|----|---------------|----|--------|--|
| Listening      | CI            |    |    | CI     |    |    | CI    |    |    | CI     |    |    | HA            |    | HA     |  |
| CI processor   | △             |    |    | △      |    |    | ○     |    |    | ○      |    |    | CI turned off |    |        |  |
| CI program     | .....         |    |    |        |    |    | ..... |    |    |        |    |    | CI turned off |    |        |  |
| HA program     | HA turned off |    |    |        |    |    |       |    |    |        |    |    | Bimodal fit   |    |        |  |
| Level (dB SPL) | 75            | 65 | 55 | 65     | 75 | 65 | 55    | 65 | 75 | 65     | 55 | 65 | 75            | 65 | 55     |  |

SUBJECT ID: \_\_\_\_\_ SEEN BY MONITOR: \_\_\_\_\_ DATE: \_\_\_\_/\_\_\_\_/\_\_\_\_

|                |                          |                          |                          |                          |                          |                          |                          |                          |                          |                          |                          |                          |
|----------------|--------------------------|--------------------------|--------------------------|--------------------------|--------------------------|--------------------------|--------------------------|--------------------------|--------------------------|--------------------------|--------------------------|--------------------------|
| Completed?     | <input type="checkbox"/> | <input type="checkbox"/> | <input type="checkbox"/> | <input type="checkbox"/> | <input type="checkbox"/> | <input type="checkbox"/> | <input type="checkbox"/> | <input type="checkbox"/> | <input type="checkbox"/> | <input type="checkbox"/> | <input type="checkbox"/> | <input type="checkbox"/> |
|                | Test                     |                          |                          | Retest                   |                          | Test                     |                          |                          | Retest                   |                          |                          |                          |
| Listening      | CIHA                     |                          |                          | CIHA                     |                          | CIHA                     |                          |                          | CIHA                     |                          |                          |                          |
| CI processor   | △                        |                          |                          | △                        |                          | ○                        |                          |                          | ○                        |                          |                          |                          |
| CI program     | .....                    |                          |                          |                          |                          | .....                    |                          |                          |                          |                          |                          |                          |
| HA program     | Bimodal fit              |                          |                          |                          |                          |                          |                          |                          |                          |                          |                          |                          |
| Level (dB SPL) | 55                       | 65                       | 75                       | 65                       | 55                       | 65                       | 75                       | 65                       |                          |                          |                          |                          |
| Completed?     | <input type="checkbox"/> | <input type="checkbox"/> | <input type="checkbox"/> | <input type="checkbox"/> | <input type="checkbox"/> | <input type="checkbox"/> | <input type="checkbox"/> | <input type="checkbox"/> | <input type="checkbox"/> | <input type="checkbox"/> | <input type="checkbox"/> | <input type="checkbox"/> |

**Remarks**

**2.5.5. MATRIX IN QUIET**

|               | Practice                 |                          | Test                     |                          | Retest                   |                          | Test                     |                          | Retest                   |                          |
|---------------|--------------------------|--------------------------|--------------------------|--------------------------|--------------------------|--------------------------|--------------------------|--------------------------|--------------------------|--------------------------|
| Listening     | CI                       |                          | CI                       |                          | CI                       |                          | CI                       |                          | CI                       |                          |
| CI processor  | △ / ○                    |                          | △                        |                          | △                        |                          | ○                        |                          | ○                        |                          |
| CI program    | .....                    |                          | .....                    |                          |                          |                          | .....                    |                          |                          |                          |
| HA program    | HA turned off            |                          |                          |                          |                          |                          |                          |                          |                          |                          |
| N sentences   | 10                       | 10                       | 10                       | 10                       | 10                       | 10                       | 10                       | 10                       | 10                       | 10                       |
| Word list nr. | .....                    | .....                    | .....                    | .....                    | .....                    | .....                    | .....                    | .....                    | .....                    | .....                    |
| Order         | 1                        |                          | .....                    | .....                    | .....                    | .....                    | .....                    | .....                    | .....                    | .....                    |
| Completed?    | <input type="checkbox"/> | <input type="checkbox"/> | <input type="checkbox"/> | <input type="checkbox"/> | <input type="checkbox"/> | <input type="checkbox"/> | <input type="checkbox"/> | <input type="checkbox"/> | <input type="checkbox"/> | <input type="checkbox"/> |

**Remarks**

**BREAK**

**2.5.6. QUESTIONNAIRES**

|                                 |                          |
|---------------------------------|--------------------------|
|                                 | Returned and checked?    |
| Date                            | ...../...../.....        |
| Sound quality descriptors (I11) | <input type="checkbox"/> |

**Remarks**

.....

**2.5.7. MATRIX IN NOISE**

|                                       | Practice                 |                          | Test                     | Retest                   | Test                     | Retest                   | Test                     | Retest                   | Test                     | Retest                   |
|---------------------------------------|--------------------------|--------------------------|--------------------------|--------------------------|--------------------------|--------------------------|--------------------------|--------------------------|--------------------------|--------------------------|
| Listening                             | CI / CIHA                |                          | CI                       | CI                       | CIHA                     | CIHA                     | CI                       | CI                       | CIHA                     | CIHA                     |
| CI processor                          | △ / ○                    |                          | △                        | △                        | △                        | △                        | ○                        | ○                        | ○                        | ○                        |
| CI program                            | .....                    |                          | .....                    |                          | .....                    |                          | .....                    |                          | .....                    |                          |
| HA program                            | Off / bim                |                          | HA off                   |                          | Bimodal                  | Bimodal                  | HA off                   |                          | Bimodal                  | Bimodal                  |
| N sentences                           | 10                       | 10                       | 10                       | 10                       | 10                       | 10                       | 10                       | 10                       | 10                       | 10                       |
| Word list nr.                         | .....                    | .....                    | .....                    | .....                    | .....                    | .....                    | .....                    | .....                    | .....                    | .....                    |
| Order                                 | .....                    |                          | .....                    | .....                    | .....                    | .....                    | .....                    | .....                    | .....                    | .....                    |
| Completed?                            | <input type="checkbox"/> | <input type="checkbox"/> | <input type="checkbox"/> | <input type="checkbox"/> | <input type="checkbox"/> | <input type="checkbox"/> | <input type="checkbox"/> | <input type="checkbox"/> | <input type="checkbox"/> | <input type="checkbox"/> |
| <b>Test result</b><br>(SRT in dB SNR) | .....                    | .....                    | .....                    | .....                    | .....                    | .....                    | .....                    | .....                    | .....                    | .....                    |
| <b>Mean result</b><br>(SRT in dB SNR) | .....                    |                          | .....                    |                          | .....                    |                          | .....                    |                          | .....                    |                          |

**Remarks**

Not performed, due to matrix in quiet SRT score = < 50%

.....

**2.5.8. PROTOCOL DEVIATIONS**

Were there any protocol deviations?  Yes  No

**Remarks**

.....

SUBJECT ID: \_\_\_\_\_ SEEN BY MONITOR: \_\_\_\_\_ DATE: \_\_\_\_/\_\_\_\_/\_\_\_\_

**2.5.9. DEVICE DEFICIENCIES**

Were there any device deficiencies?  Yes  No

**Remarks**

\_\_\_\_\_

**2.5.10. ADVERSE EVENTS**

Checked and acted on adverse events?  Yes  No

**Remarks**

\_\_\_\_\_

**General remarks**

\_\_\_\_\_

**2.6. Visit F5 (week 4)**

Date:

Bimodal user:  Yes  No, because.....

**2.6.1. SPEECH THERAPY**

Particularities from speech therapy to be taken into account?  No  Yes, note here

**Remarks**

.....

**2.6.2. PREFERENCE SCALES**

Preference scales (i03) completed?  Yes  No

**2.6.3. CHECK-UP FITTING**

Preference scales (i03) completed?  Yes  No

Fitting form datalogging & impedances (i02) completed?  Yes  No

Compliance forms completed?  Yes  No

**Remarks**

.....

**2.6.4. SPEECH AUDIOMETRY**

|                | Test                     |                          |                          | Retest                   |                          | Test                     |                          |                          | Retest                   |                          |  |  |
|----------------|--------------------------|--------------------------|--------------------------|--------------------------|--------------------------|--------------------------|--------------------------|--------------------------|--------------------------|--------------------------|--|--|
| Listening      | CI                       |                          |                          | CI                       |                          | CI                       |                          |                          | CI                       |                          |  |  |
| CI processor   | △                        |                          |                          | △                        |                          | ○                        |                          |                          | ○                        |                          |  |  |
| CI program     | .....                    |                          |                          |                          | .....                    |                          |                          |                          |                          |                          |  |  |
| HA program     | HA turned off            |                          |                          |                          |                          |                          |                          |                          |                          |                          |  |  |
| Level (dB SPL) | 75                       | 65                       | 55                       | 65                       | 75                       | 65                       | 55                       | 65                       |                          |                          |  |  |
| Completed?     | <input type="checkbox"/> | <input type="checkbox"/> | <input type="checkbox"/> | <input type="checkbox"/> | <input type="checkbox"/> | <input type="checkbox"/> | <input type="checkbox"/> | <input type="checkbox"/> | <input type="checkbox"/> | <input type="checkbox"/> |  |  |

**Remarks**

.....

**2.6.5. MATRIX IN QUIET**

|               | Practice                 |                          | Test                     | Retest                   | Test                     | Retest                   |
|---------------|--------------------------|--------------------------|--------------------------|--------------------------|--------------------------|--------------------------|
| Listening     | CI                       |                          | CI                       | CI                       | CI                       | CI                       |
| CI processor  | △ / ○                    |                          | △                        | △                        | ○                        | ○                        |
| CI program    | .....                    |                          | .....                    | .....                    | .....                    | .....                    |
| HA program    | HA off                   |                          |                          |                          |                          |                          |
| N sentences   | 10                       | 10                       | 10                       | 10                       | 10                       | 10                       |
| Word list nr. | .....                    | .....                    | .....                    | .....                    | .....                    | .....                    |
| Order         | 1                        |                          | 2                        | 3                        | 4                        | 5                        |
| Completed?    | <input type="checkbox"/> | <input type="checkbox"/> | <input type="checkbox"/> | <input type="checkbox"/> | <input type="checkbox"/> | <input type="checkbox"/> |

**Remarks**

**2.6.6. MATRIX IN NOISE**

|                                       | Practice                 |                          | Test                     | Retest                   | Test                     | Retest                   |
|---------------------------------------|--------------------------|--------------------------|--------------------------|--------------------------|--------------------------|--------------------------|
| Listening                             | CI                       |                          | CI                       | CI                       | CI                       | CI                       |
| CI processor                          | △ / ○                    |                          | △                        | △                        | ○                        | ○                        |
| CI program                            | .....                    |                          | .....                    | .....                    | .....                    | .....                    |
| HA program                            | HA off                   |                          |                          |                          |                          |                          |
| N sentences                           | 10                       | 10                       | 10                       | 10                       | 10                       | 10                       |
| Word list nr.                         | .....                    | .....                    | .....                    | .....                    | .....                    | .....                    |
| Order                                 | 1                        |                          | 2                        | 3                        | 4                        | 5                        |
| Completed?                            | <input type="checkbox"/> | <input type="checkbox"/> | <input type="checkbox"/> | <input type="checkbox"/> | <input type="checkbox"/> | <input type="checkbox"/> |
| <b>Test result</b><br>(SRT in dB SNR) | .....                    | .....                    | .....                    | .....                    | .....                    | .....                    |
| <b>Mean result</b><br>(SRT in dB SNR) |                          |                          | .....                    |                          | .....                    |                          |

**Remarks**

Not performed, due to matrix in quiet SRT score = < 50%

**BREAK**

SUBJECT ID: \_\_\_\_\_ SEEN BY MONITOR: \_\_\_\_\_ DATE: \_\_\_\_/\_\_\_\_/\_\_\_\_

**2.6.7. LISTENING EFFORT**

|                       | Practice                 | Test                     | Test                     | Test                     | Test                     |
|-----------------------|--------------------------|--------------------------|--------------------------|--------------------------|--------------------------|
| Listening             | CI                       | CI                       | CI                       | CIHA                     | CIHA                     |
| CI processor          | △ / ○                    | △                        | ○                        | △                        | ○                        |
| CI program            | .....                    | .....                    | .....                    | .....                    | .....                    |
| HA program            | Off / bimodal            | HA off                   |                          | Bimodal fit              | Bimodal fit              |
| N                     | 1                        | 5                        | 5                        | 5                        | 5                        |
| SRT input (in dB SNR) | .....<br>.....           | .....<br>.....           | .....<br>.....           | .....<br>.....           | .....<br>.....           |
| Order                 | .....                    | .....                    | .....                    | .....                    | .....                    |
| Completed?            | <input type="checkbox"/> | <input type="checkbox"/> | <input type="checkbox"/> | <input type="checkbox"/> | <input type="checkbox"/> |

**Remarks**

**2.6.8. LOUDNESS SCALING**

|               | Test                     | Test                     | Test                     |
|---------------|--------------------------|--------------------------|--------------------------|
| Listening     | CI                       | CI                       | HA                       |
| CI processor  | △                        | ○                        |                          |
| CI program    | .....                    | .....                    | CI off                   |
| HA program    | HA off                   |                          | Bimodal fit              |
| N frequencies | 4                        | 4                        | 4                        |
| Order         | .....                    | .....                    | .....                    |
| Completed?    | <input type="checkbox"/> | <input type="checkbox"/> | <input type="checkbox"/> |

**Remarks**

**2.6.9. SMRT**

|              | Test                     | Retest                   | Test                     | Retest                   |
|--------------|--------------------------|--------------------------|--------------------------|--------------------------|
| Listening    | CI                       | CI                       | CI                       | CI                       |
| CI processor | △                        | △                        | ○                        | ○                        |
| CI program   | .....                    |                          | .....                    |                          |
| HA program   | HA turned off            |                          |                          |                          |
| Completed?   | <input type="checkbox"/> | <input type="checkbox"/> | <input type="checkbox"/> | <input type="checkbox"/> |

**Remarks**

SUBJECT ID: \_\_\_\_\_ SEEN BY MONITOR: \_\_\_\_\_ DATE: \_\_\_\_/\_\_\_\_/\_\_\_\_

\_\_\_\_\_

**2.6.10. PROTOCOL DEVIATIONS**

Were there any protocol deviations?  Yes  No

**Remarks**

\_\_\_\_\_

**2.6.11. DEVICE DEFICIENCIES**

Were there any device deficiencies?  Yes  No

**Remarks**

\_\_\_\_\_

**2.6.12. ADVERSE EVENTS**

Checked and acted on adverse events?  Yes  No

**Remarks**

\_\_\_\_\_

**General remarks**

\_\_\_\_\_



**2.7. Visit F6 (week 5)**

Date:

Bimodal user:  Yes  No, because.....

**2.7.1. SPEECH THERAPY**

Particularities from speech therapy to be taken into account?  No  Yes, note here

**Remarks**

.....

**2.7.2. PREFERENCE SCALES**

Preference scales (i03) completed?  Yes  No

**2.7.3. CHECK-UP FITTING**

Fitting form datalogging & impedances (i02) completed?  Yes  No

Compliance forms completed?  Yes  No

**Remarks**

.....

**BREAK**

**2.7.4. SPEECH AUDIOMETRY**

|                | Test                     |                          |                          | Retest                   |                          | Test                     |                          |                          | Retest                   |                          |
|----------------|--------------------------|--------------------------|--------------------------|--------------------------|--------------------------|--------------------------|--------------------------|--------------------------|--------------------------|--------------------------|
| Listening      | CI                       |                          |                          | CI                       |                          | CI                       |                          |                          | CI                       |                          |
| CI processor   | △                        |                          |                          | △                        |                          | ○                        |                          |                          | ○                        |                          |
| CI program     | .....                    |                          |                          |                          | .....                    |                          |                          |                          |                          |                          |
| HA program     | HA turned off            |                          |                          |                          |                          |                          |                          |                          |                          |                          |
| Level (dB SPL) | 75                       | 65                       | 55                       | 65                       | 75                       | 65                       | 55                       | 65                       |                          |                          |
| Completed?     | <input type="checkbox"/> | <input type="checkbox"/> | <input type="checkbox"/> | <input type="checkbox"/> | <input type="checkbox"/> | <input type="checkbox"/> | <input type="checkbox"/> | <input type="checkbox"/> | <input type="checkbox"/> | <input type="checkbox"/> |

**Remarks**

.....

**2.7.5. MATRIX IN QUIET**

|               | Practice                 |                          | Test                     | Retest                   | Test                     | Retest                   |
|---------------|--------------------------|--------------------------|--------------------------|--------------------------|--------------------------|--------------------------|
| Listening     | CI                       |                          | CI                       | CI                       | CI                       | CI                       |
| CI processor  | △ / ○                    |                          | △                        | △                        | ○                        | ○                        |
| CI program    | .....                    |                          | .....                    |                          | .....                    |                          |
| HA program    | HA turned off            |                          |                          |                          |                          |                          |
| N sentences   | 10                       | 10                       | 10                       | 10                       | 10                       | 10                       |
| Word list nr. | .....                    | .....                    | .....                    | .....                    | .....                    | .....                    |
| Order         | 1                        |                          | 2                        | 3                        | 4                        | 5                        |
| Completed?    | <input type="checkbox"/> | <input type="checkbox"/> | <input type="checkbox"/> | <input type="checkbox"/> | <input type="checkbox"/> | <input type="checkbox"/> |

**Remarks**  
 \_\_\_\_\_  
 \_\_\_\_\_

**2.7.6. MATRIX IN NOISE**

|               | Practice                 |                          | Test                     | Retest                   | Test                     | Retest                   |
|---------------|--------------------------|--------------------------|--------------------------|--------------------------|--------------------------|--------------------------|
| Listening     | CI                       |                          | CI                       | CI                       | CI                       | CI                       |
| CI processor  | △ / ○                    |                          | △                        | △                        | ○                        | ○                        |
| CI program    | .....                    |                          | .....                    |                          | .....                    |                          |
| HA program    | HA turned off            |                          |                          |                          |                          |                          |
| N sentences   | 10                       | 10                       | 10                       | 10                       | 10                       | 10                       |
| Word list nr. | .....                    | .....                    | .....                    | .....                    | .....                    | .....                    |
| Order         | 1                        |                          | .....                    | .....                    | .....                    | .....                    |
| Completed?    | <input type="checkbox"/> | <input type="checkbox"/> | <input type="checkbox"/> | <input type="checkbox"/> | <input type="checkbox"/> | <input type="checkbox"/> |

**Remarks**  
 Not performed, due to matrix in quiet SRT score = < 50%  
 \_\_\_\_\_  
 \_\_\_\_\_

**2.7.7. PROTOCOL DEVIATIONS**

Were there any protocol deviations?  Yes  No

**Remarks**  
 \_\_\_\_\_  
 \_\_\_\_\_  
 \_\_\_\_\_

**2.7.8. DEVICE DEFICIENCIES**

Were there any device deficiencies?  Yes  No

**Remarks**

\_\_\_\_\_

**2.7.9. ADVERSE EVENTS**

Checked and acted on adverse events?  Yes  No

**Remarks**

\_\_\_\_\_

**General remarks**

\_\_\_\_\_

ELEPHANT (METC 18-028) Version: 3.2 Name investigator: \_\_\_\_\_ Signature: \_\_\_\_\_

SUBJECT ID: \_\_\_\_\_ SEEN BY MONITOR: \_\_\_\_\_ DATE: \_\_\_\_/\_\_\_\_/\_\_\_\_

**2.8. Visit F7 (week 6)**

Date:

Bimodal user:  Yes  No, because.....

**2.8.1. TONE AUDIOMETRY**

|            | CI                       |                          |
|------------|--------------------------|--------------------------|
| Program    | △                        | ○                        |
| CI program | .....                    | .....                    |
| Completed? | <input type="checkbox"/> | <input type="checkbox"/> |

**Remarks**

**2.8.2. PREFERENCE SCALES**

Preference scales (i03) completed?  Yes  No

**2.8.3. FITTING**

Particularities from previous fitting to be taken into account?  No  Yes, see fitting form

Particularities relevant for next fitting?  No  Yes, note on fitting form

Fitting form (i02) completed?  Yes  No

Compliance forms completed?  Yes  No

Consequences of CI compliance measurements, based on calculations (fitting form) and cut-off points

(Appendix Compliance):

Study continuation  Removed from CI per protocol population

Early terminated and transferred to clinical care

Consequences of HA compliance measurements, based on calculations (fitting form) and cut-off points

(Appendix Compliance):

Study continuation  No bimodal testing at F10 → Check 'No bimodal user at 2.10'

**Remarks**

**2.8.4. SPEECH THERAPY**

Particularities from speech therapy to be taken into account?  No  Yes, note here

.....  
**Remarks**  
 \_\_\_\_\_  
 \_\_\_\_\_

**BREAK**

**2.8.5. SPEECH AUDIOMETRY**

|                | Test                     |                          |                          | Retest                   |                          | Test                     |                          |                          | Retest                   |                          |
|----------------|--------------------------|--------------------------|--------------------------|--------------------------|--------------------------|--------------------------|--------------------------|--------------------------|--------------------------|--------------------------|
| Listening      | CI                       |                          |                          | CI                       |                          | CI                       |                          |                          | CI                       |                          |
| CI processor   | △                        |                          |                          | △                        |                          | ○                        |                          |                          | ○                        |                          |
| CI program     | .....                    |                          |                          |                          | .....                    |                          |                          |                          |                          |                          |
| HA program     | HA turned off            |                          |                          |                          |                          |                          |                          |                          |                          |                          |
| Level (dB SPL) | 75                       | 65                       | 55                       | 65                       | 75                       | 65                       | 55                       | 65                       |                          |                          |
| Completed?     | <input type="checkbox"/> | <input type="checkbox"/> | <input type="checkbox"/> | <input type="checkbox"/> | <input type="checkbox"/> | <input type="checkbox"/> | <input type="checkbox"/> | <input type="checkbox"/> | <input type="checkbox"/> | <input type="checkbox"/> |

**Remarks**  
 \_\_\_\_\_  
 \_\_\_\_\_

**2.8.6. MATRIX IN QUIET**

|               | Practice                 |                          | Test                     |                          | Retest                   |                          | Test                     |                          | Retest                   |                          |
|---------------|--------------------------|--------------------------|--------------------------|--------------------------|--------------------------|--------------------------|--------------------------|--------------------------|--------------------------|--------------------------|
| Listening     | CI                       |                          | CI                       |                          | CI                       |                          | CI                       |                          | CI                       |                          |
| CI processor  | △ / ○                    |                          | △                        |                          | △                        |                          | ○                        |                          | ○                        |                          |
| CI program    | .....                    |                          | .....                    |                          |                          |                          | .....                    |                          |                          |                          |
| HA program    | HA turned off            |                          |                          |                          |                          |                          |                          |                          |                          |                          |
| N sentences   | 10                       | 10                       | 10                       | 10                       | 10                       | 10                       | 10                       | 10                       | 10                       | 10                       |
| Word list nr. | .....                    | .....                    | .....                    | .....                    | .....                    | .....                    | .....                    | .....                    | .....                    | .....                    |
| Order         | 1                        |                          | .....                    |                          | .....                    |                          | .....                    |                          | .....                    |                          |
| Completed?    | <input type="checkbox"/> | <input type="checkbox"/> | <input type="checkbox"/> | <input type="checkbox"/> | <input type="checkbox"/> | <input type="checkbox"/> | <input type="checkbox"/> | <input type="checkbox"/> | <input type="checkbox"/> | <input type="checkbox"/> |

**Remarks**  
 \_\_\_\_\_  
 \_\_\_\_\_

**2.8.7. MATRIX IN NOISE**

|               | Practice                 |                          | Test                     | Retest                   | Test                     | Retest                   |
|---------------|--------------------------|--------------------------|--------------------------|--------------------------|--------------------------|--------------------------|
| Listening     | CI                       |                          | CI                       | CI                       | CI                       | CI                       |
| CI processor  | △ / ○                    |                          | △                        | △                        | ○                        | ○                        |
| CI program    | .....                    |                          | .....                    |                          | .....                    |                          |
| HA program    | HA turned off            |                          |                          |                          |                          |                          |
| N sentences   | 10                       | 10                       | 10                       | 10                       | 10                       | 10                       |
| Word list nr. | .....                    | .....                    | .....                    | .....                    | .....                    | .....                    |
| Order         | 1                        |                          | .....                    | .....                    | .....                    | .....                    |
| Completed?    | <input type="checkbox"/> | <input type="checkbox"/> | <input type="checkbox"/> | <input type="checkbox"/> | <input type="checkbox"/> | <input type="checkbox"/> |

**Remarks**

**2.8.8. PROTOCOL DEVIATIONS**

Were there any protocol deviations?  Yes  No

**Remarks**

**2.8.9. DEVICE DEFICIENCIES**

Were there any device deficiencies?  Yes  No

**Remarks**

**2.8.10. ADVERSE EVENTS**

Checked and acted on adverse events?  Yes  No

**Remarks**

**General remarks**

SUBJECT ID: \_\_\_\_\_ SEEN BY MONITOR: \_\_\_\_\_ DATE: \_\_\_\_/\_\_\_\_/\_\_\_\_

ELEPHANT (METC 18-028) Version: 3.2 Name investigator: \_\_\_\_\_ Signature: \_\_\_\_\_

SUBJECT ID: \_\_\_\_\_ SEEN BY MONITOR: \_\_\_\_\_ DATE: \_\_\_\_/\_\_\_\_/\_\_\_\_



**2.9. Visit F8 (week 7)**

Date:

Bimodal user:  Yes  No, because.....

**2.9.1. SPEECH THERAPY**

Particularities from speech therapy to be taken into account?  No  Yes, note here

**Remarks**

.....

**2.9.2. PREFERENCE SCALES**

Preference scales (i03) completed?  Yes  No

**2.9.3. CHECK-UP FITTING**

Fitting form datalogging & impedances (i02) completed?  Yes  No

Compliance forms completed?  Yes  No

**Remarks**

.....

**BREAK**

**2.9.4. SPEECH AUDIOMETRY**

|                | Test                     |                          |                          | Retest                   |                          | Test                     |                          |                          | Retest                   |                          |
|----------------|--------------------------|--------------------------|--------------------------|--------------------------|--------------------------|--------------------------|--------------------------|--------------------------|--------------------------|--------------------------|
| Listening      | CI                       |                          |                          | CI                       |                          | CI                       |                          |                          | CI                       |                          |
| CI processor   | △                        |                          |                          | △                        |                          | ○                        |                          |                          | ○                        |                          |
| CI program     | .....                    |                          |                          |                          | .....                    |                          |                          |                          |                          |                          |
| HA program     | HA turned off            |                          |                          |                          |                          |                          |                          |                          |                          |                          |
| Level (dB SPL) | 75                       | 65                       | 55                       | 65                       | 75                       | 65                       | 55                       | 65                       |                          |                          |
| Completed?     | <input type="checkbox"/> | <input type="checkbox"/> | <input type="checkbox"/> | <input type="checkbox"/> | <input type="checkbox"/> | <input type="checkbox"/> | <input type="checkbox"/> | <input type="checkbox"/> | <input type="checkbox"/> | <input type="checkbox"/> |

**Remarks**

.....

**2.9.5. MATRIX IN QUIET**

|               | Practice                 |                          | Test                     | Retest                   | Test                     | Retest                   |
|---------------|--------------------------|--------------------------|--------------------------|--------------------------|--------------------------|--------------------------|
| Listening     | CI                       |                          | CI                       | CI                       | CI                       | CI                       |
| CI processor  | △ / ○                    |                          | △                        | △                        | ○                        | ○                        |
| CI program    | .....                    |                          | .....                    |                          | .....                    |                          |
| HA program    | HA off                   |                          |                          |                          |                          |                          |
| N sentences   | 10                       | 10                       | 10                       | 10                       | 10                       | 10                       |
| Word list nr. | .....                    | .....                    | .....                    | .....                    | .....                    | .....                    |
| Order         | 1                        |                          | .....                    | .....                    | .....                    | .....                    |
| Completed?    | <input type="checkbox"/> | <input type="checkbox"/> | <input type="checkbox"/> | <input type="checkbox"/> | <input type="checkbox"/> | <input type="checkbox"/> |

**Remarks**

**2.9.6. MATRIX IN NOISE**

|               | Practice                 |                          | Test                     | Retest                   | Test                     | Retest                   |
|---------------|--------------------------|--------------------------|--------------------------|--------------------------|--------------------------|--------------------------|
| Listening     | CI                       |                          | CI                       | CI                       | CI                       | CI                       |
| CI processor  | △ / ○                    |                          | △                        | △                        | ○                        | ○                        |
| CI program    | .....                    |                          | .....                    |                          | .....                    |                          |
| HA program    | HA turned off            |                          |                          |                          |                          |                          |
| N sentences   | 10                       | 10                       | 10                       | 10                       | 10                       | 10                       |
| Word list nr. | .....                    | .....                    | .....                    | .....                    | .....                    | .....                    |
| Order         | 1                        |                          | .....                    | .....                    | .....                    | .....                    |
| Completed?    | <input type="checkbox"/> | <input type="checkbox"/> | <input type="checkbox"/> | <input type="checkbox"/> | <input type="checkbox"/> | <input type="checkbox"/> |

**Remarks**

**2.9.7. PROTOCOL DEVIATIONS**

Were there any protocol deviations?  Yes  No

**Remarks**

SUBJECT ID: \_\_\_\_\_ SEEN BY MONITOR: \_\_\_\_\_ DATE: \_\_\_\_/\_\_\_\_/\_\_\_\_

**2.9.8. ADVERSE EVENTS**

Checked and acted on adverse events?  Yes  No

**Remarks**

\_\_\_\_\_

**General remarks**

\_\_\_\_\_

ELEPHANT (METC 18-028) Version: 3.2 Name investigator: \_\_\_\_\_ Signature: \_\_\_\_\_

SUBJECT ID: \_\_\_\_\_ SEEN BY MONITOR: \_\_\_\_\_ DATE: \_\_\_\_/\_\_\_\_/\_\_\_\_

**2.10. Visit F9 (week 8)**

Date:

Bimodal user:  Yes  No, because.....

**2.10.1. SPEECH THERAPY**

Particularities from speech therapy to be taken into account?  No  Yes, note here

**Remarks**

**2.10.2. PREFERENCE SCALES**

Preference scales (i03) completed?  Yes  No

**2.10.3. CHECK-UP FITTING**

Fitting form datalogging & impedances (i02) completed?  Yes  No

Compliance forms completed?  Yes  No

ECAP measured?  Yes  No

**Remarks**

**2.10.4. SPEECH AUDIOMETRY**

|                | Test                     |                          |                          | Retest                   |                          | Test                     |                          |                          | Retest                   |                          |
|----------------|--------------------------|--------------------------|--------------------------|--------------------------|--------------------------|--------------------------|--------------------------|--------------------------|--------------------------|--------------------------|
| Listening      | CI                       |                          |                          | CI                       |                          | CI                       |                          |                          | CI                       |                          |
| CI processor   | △                        |                          |                          | △                        |                          | ○                        |                          |                          | ○                        |                          |
| CI program     | .....                    |                          |                          |                          | .....                    |                          |                          |                          |                          |                          |
| HA program     | HA turned off            |                          |                          |                          |                          |                          |                          |                          |                          |                          |
| Level (dB SPL) | 75                       | 65                       | 55                       | 65                       | 75                       | 65                       | 55                       | 65                       |                          |                          |
| Completed?     | <input type="checkbox"/> | <input type="checkbox"/> | <input type="checkbox"/> | <input type="checkbox"/> | <input type="checkbox"/> | <input type="checkbox"/> | <input type="checkbox"/> | <input type="checkbox"/> | <input type="checkbox"/> | <input type="checkbox"/> |

**Remarks**

**2.10.5. MATRIX IN QUIET**

|               | Practice                 |                          | Test                     | Retest                   | Test                     | Retest                   |
|---------------|--------------------------|--------------------------|--------------------------|--------------------------|--------------------------|--------------------------|
| Listening     | CI                       |                          | CI                       | CI                       | CI                       | CI                       |
| CI processor  | △ / ○                    |                          | △                        | △                        | ○                        | ○                        |
| CI program    | .....                    |                          | .....                    |                          | .....                    |                          |
| HA program    | HA off                   |                          |                          |                          |                          |                          |
| N sentences   | 10                       | 10                       | 10                       | 10                       | 10                       | 10                       |
| Word list nr. | .....                    | .....                    | .....                    | .....                    | .....                    | .....                    |
| Order         | 1                        |                          | .....                    | .....                    | .....                    | .....                    |
| Completed?    | <input type="checkbox"/> | <input type="checkbox"/> | <input type="checkbox"/> | <input type="checkbox"/> | <input type="checkbox"/> | <input type="checkbox"/> |

**Remarks**

**2.10.6. MATRIX IN NOISE**

|               | Practice                 |                          | Test                     | Retest                   | Test                     | Retest                   |
|---------------|--------------------------|--------------------------|--------------------------|--------------------------|--------------------------|--------------------------|
| Listening     | CI                       |                          | CI                       | CI                       | CI                       | CI                       |
| CI processor  | △                        |                          | △                        | △                        | ○                        | ○                        |
| CI program    | .....                    |                          | .....                    |                          | .....                    |                          |
| HA program    | HA turned off            |                          |                          |                          |                          |                          |
| N sentences   | 10                       | 10                       | 10                       | 10                       | 10                       | 10                       |
| Word list nr. | .....                    | .....                    | .....                    | .....                    | .....                    | .....                    |
| Order         | 1                        |                          | 2                        | 3                        | 4                        | 5                        |
| Completed?    | <input type="checkbox"/> | <input type="checkbox"/> | <input type="checkbox"/> | <input type="checkbox"/> | <input type="checkbox"/> | <input type="checkbox"/> |

**Remarks**

**2.10.7. PROTOCOL DEVIATIONS**

Were there any protocol deviations?  Yes  No

**Remarks**

\_\_\_\_\_

**2.10.8. DEVICE DEFICIENCIES**

Were there any device deficiencies?  Yes  No

**Remarks**

\_\_\_\_\_

**2.10.9. ADVERSE EVENTS**

Checked and acted on adverse events?  Yes  No

**Remarks**

\_\_\_\_\_

**General remarks**

\_\_\_\_\_

ELEPHANT (METC 18-028) Version: 3.2 Name investigator: \_\_\_\_\_ Signature: \_\_\_\_\_

SUBJECT ID: \_\_\_\_\_ SEEN BY MONITOR: \_\_\_\_\_ DATE: \_\_\_\_/\_\_\_\_/\_\_\_\_



**2.11. Visit F10 (week 10)**

Date:

Bimodal user:  Yes  No, because.....

**2.11.1. SPEECH THERAPY**

Particularities from speech therapy to be taken into account?  No  Yes, note here

**Remarks**

.....

**2.11.2. PREFERENCE SCALES**

Preference scales (i03) completed?  Yes  No

**2.11.3. CHECK-UP FITTING**

Fitting form datalogging & impedances (i02) completed?  Yes  No

Compliance forms completed?  Yes  No

**Remarks**

.....

**2.11.4. QUESTIONNAIRES**

|                                 | Given to subject         | To be returned |
|---------------------------------|--------------------------|----------------|
| Date                            | ...../...../.....        | Visit F11      |
| Sound quality descriptors (I11) | <input type="checkbox"/> |                |

**Remarks**

.....

**2.11.5. SPEECH AUDIOMETRY**

|                | Test          |    |    | Retest |    |    | Test  |    |    | Retest      |    |    |
|----------------|---------------|----|----|--------|----|----|-------|----|----|-------------|----|----|
| Listening      | CI            |    |    | CI     |    |    | CI    |    |    | HA          |    |    |
| CI processor   | △             |    |    | △      |    |    | ○     |    |    | ○           |    |    |
| CI program     | .....         |    |    |        |    |    | ..... |    |    |             |    |    |
| HA program     | HA turned off |    |    |        |    |    |       |    |    | Bimodal fit |    |    |
| Level (dB SPL) | 75            | 65 | 55 | 65     | 75 | 65 | 55    | 65 | 75 | 65          | 55 | 65 |

SUBJECT ID: \_\_\_\_\_ SEEN BY MONITOR: \_\_\_\_\_ DATE: \_\_\_\_/\_\_\_\_/\_\_\_\_

|                |                          |                          |                          |                          |                          |                          |                          |                          |                          |                          |                          |                          |
|----------------|--------------------------|--------------------------|--------------------------|--------------------------|--------------------------|--------------------------|--------------------------|--------------------------|--------------------------|--------------------------|--------------------------|--------------------------|
| Completed?     | <input type="checkbox"/> | <input type="checkbox"/> | <input type="checkbox"/> | <input type="checkbox"/> | <input type="checkbox"/> | <input type="checkbox"/> | <input type="checkbox"/> | <input type="checkbox"/> | <input type="checkbox"/> | <input type="checkbox"/> | <input type="checkbox"/> | <input type="checkbox"/> |
|                | Test                     |                          |                          | Retest                   | Test                     |                          |                          | Retest                   |                          |                          |                          |                          |
| Listening      | CIHA                     |                          |                          | CIHA                     | CIHA                     |                          |                          | CIHA                     |                          |                          |                          |                          |
| CI processor   | △                        |                          |                          | △                        | ○                        |                          |                          | ○                        |                          |                          |                          |                          |
| CI program     | .....                    |                          |                          |                          | .....                    |                          |                          |                          |                          |                          |                          |                          |
| HA program     | Bimodal fit              |                          |                          |                          |                          |                          |                          |                          |                          |                          |                          |                          |
| Level (dB SPL) | 55                       | 65                       | 75                       | 65                       | 55                       | 65                       | 75                       | 65                       |                          |                          |                          |                          |
| Completed?     | <input type="checkbox"/> | <input type="checkbox"/> | <input type="checkbox"/> | <input type="checkbox"/> | <input type="checkbox"/> | <input type="checkbox"/> | <input type="checkbox"/> | <input type="checkbox"/> |                          |                          |                          |                          |

**Remarks**

**BREAK**

**2.11.6. MATRIX IN QUIET**

|               | Practice                 |                          | Test                     | Retest                   | Test                     | Retest                   |
|---------------|--------------------------|--------------------------|--------------------------|--------------------------|--------------------------|--------------------------|
| Listening     | CI                       |                          | CI                       | CI                       | CI                       | CI                       |
| CI processor  | △ / ○                    |                          | △                        | △                        | ○                        | ○                        |
| CI program    | .....                    |                          | .....                    |                          | .....                    |                          |
| HA program    | HA turned off            |                          |                          |                          |                          |                          |
| N sentences   | 10                       | 10                       | 10                       | 10                       | 10                       | 10                       |
| Word list nr. | .....                    | .....                    | .....                    | .....                    | .....                    | .....                    |
| Order         | 1                        |                          | .....                    | .....                    | .....                    | .....                    |
| Completed?    | <input type="checkbox"/> | <input type="checkbox"/> | <input type="checkbox"/> | <input type="checkbox"/> | <input type="checkbox"/> | <input type="checkbox"/> |

**Remarks**

**2.11.7. MATRIX IN NOISE**

|                                    | Practice                                                                          |                          | Test                                                                              | Retest                                                                            | Test                                                                              | Retest                                                                            | Test                                                                               | Retest                                                                              | Test                                                                                | Retest                                                                              |
|------------------------------------|-----------------------------------------------------------------------------------|--------------------------|-----------------------------------------------------------------------------------|-----------------------------------------------------------------------------------|-----------------------------------------------------------------------------------|-----------------------------------------------------------------------------------|------------------------------------------------------------------------------------|-------------------------------------------------------------------------------------|-------------------------------------------------------------------------------------|-------------------------------------------------------------------------------------|
| Listening                          | CI / CIHA                                                                         |                          | CI                                                                                | CI                                                                                | CIHA                                                                              | CIHA                                                                              | CI                                                                                 | CI                                                                                  | CIHA                                                                                | CIHA                                                                                |
| CI processor                       |  |                          |  |  |  |  |  |  |  |  |
| CI program                         | .....                                                                             |                          | .....                                                                             |                                                                                   | .....                                                                             |                                                                                   | .....                                                                              |                                                                                     | .....                                                                               |                                                                                     |
| HA program                         | Off / bimodal                                                                     |                          | HA turned off                                                                     |                                                                                   | Bimodal fit                                                                       | Bimodal fit                                                                       | HA turned off                                                                      |                                                                                     | Bimodal fit                                                                         | Bimodal fit                                                                         |
| N sentences                        | 10                                                                                | 10                       | 10                                                                                | 10                                                                                | 10                                                                                | 10                                                                                | 10                                                                                 | 10                                                                                  | 10                                                                                  | 10                                                                                  |
| Word list                          | .....                                                                             | .....                    | .....                                                                             | .....                                                                             | .....                                                                             | .....                                                                             | .....                                                                              | .....                                                                               | .....                                                                               | .....                                                                               |
| Order                              | .....                                                                             |                          | .....                                                                             | .....                                                                             | .....                                                                             | .....                                                                             | .....                                                                              | .....                                                                               | .....                                                                               | .....                                                                               |
| Completed?                         | <input type="checkbox"/>                                                          | <input type="checkbox"/> | <input type="checkbox"/>                                                          | <input type="checkbox"/>                                                          | <input type="checkbox"/>                                                          | <input type="checkbox"/>                                                          | <input type="checkbox"/>                                                           | <input type="checkbox"/>                                                            | <input type="checkbox"/>                                                            | <input type="checkbox"/>                                                            |
| <b>Test result</b> (SRT in dB SNR) | .....                                                                             | .....                    | .....                                                                             | .....                                                                             | .....                                                                             | .....                                                                             | .....                                                                              | .....                                                                               | .....                                                                               | .....                                                                               |
| <b>Mean result</b> (SRT in dB SNR) | .....                                                                             |                          | .....                                                                             |                                                                                   | .....                                                                             |                                                                                   | .....                                                                              |                                                                                     | .....                                                                               |                                                                                     |

**Remarks**

**BREAK**

**2.11.8. MATRIX IN NOISE SPATIAL**

|              |                                                                                     |                                                                                     |                                                                                     |                                                                                     |                                                                                     |                                                                                       |                                                                                       |                                                                                       |
|--------------|-------------------------------------------------------------------------------------|-------------------------------------------------------------------------------------|-------------------------------------------------------------------------------------|-------------------------------------------------------------------------------------|-------------------------------------------------------------------------------------|---------------------------------------------------------------------------------------|---------------------------------------------------------------------------------------|---------------------------------------------------------------------------------------|
|              | Test                                                                                | Retest                                                                              | Test                                                                                | Retest                                                                              | Test                                                                                | Retest                                                                                | Test                                                                                  | Retest                                                                                |
| Listening    | CI                                                                                  | CI                                                                                  | CI                                                                                  | CI                                                                                  | CI                                                                                  | CI                                                                                    | CI                                                                                    | CI                                                                                    |
| Spatial      | SONCI                                                                               | SONCI                                                                               | SONHA                                                                               | SONHA                                                                               | SONCI                                                                               | SONCI                                                                                 | SONHA                                                                                 | SONHA                                                                                 |
| CI processor |    |    |    |    |    |    |    |    |
| CI program   | .....                                                                               |                                                                                     | .....                                                                               |                                                                                     | .....                                                                               |                                                                                       | .....                                                                                 |                                                                                       |
| HA program   | HA turned off                                                                       |                                                                                     |                                                                                     |                                                                                     |                                                                                     |                                                                                       |                                                                                       |                                                                                       |
| N sentences  | 10                                                                                  | 10                                                                                  | 10                                                                                  | 10                                                                                  | 10                                                                                  | 10                                                                                    | 10                                                                                    | 10                                                                                    |
| Hammerfall   | .....                                                                               | .....                                                                               | .....                                                                               | .....                                                                               | .....                                                                               | .....                                                                                 | .....                                                                                 | .....                                                                                 |
| Word list    | .....                                                                               | .....                                                                               | .....                                                                               | .....                                                                               | .....                                                                               | .....                                                                                 | .....                                                                                 | .....                                                                                 |
| Order        | .....                                                                               | .....                                                                               | .....                                                                               | .....                                                                               | .....                                                                               | .....                                                                                 | .....                                                                                 | .....                                                                                 |
| Completed?   | <input type="checkbox"/>                                                            | <input type="checkbox"/>                                                            | <input type="checkbox"/>                                                            | <input type="checkbox"/>                                                            | <input type="checkbox"/>                                                            | <input type="checkbox"/>                                                              | <input type="checkbox"/>                                                              | <input type="checkbox"/>                                                              |
|              | Test                                                                                | Retest                                                                              | Test                                                                                | Retest                                                                              | Test                                                                                | Retest                                                                                | Test                                                                                  | Retest                                                                                |
| Listening    | CIHA                                                                                | CIHA                                                                                | CIHA                                                                                | CIHA                                                                                | CIHA                                                                                | CIHA                                                                                  | CIHA                                                                                  | CIHA                                                                                  |
| Spatial      | SONCI                                                                               | SONCI                                                                               | SONHA                                                                               | SONHA                                                                               | SONCI                                                                               | SONCI                                                                                 | SONHA                                                                                 | SONHA                                                                                 |
| CI processor |  |  |  |  |  |  |  |  |
| CI program   | .....                                                                               |                                                                                     | .....                                                                               |                                                                                     | .....                                                                               |                                                                                       | .....                                                                                 |                                                                                       |
| HA program   | Bimodal fit                                                                         | Bimodal fit                                                                         | Bimodal fit                                                                         | Bimodal fit                                                                         | Bimodal fit                                                                         | Bimodal fit                                                                           | Bimodal fit                                                                           | Bimodal fit                                                                           |
| N sentences  | 10                                                                                  | 10                                                                                  | 10                                                                                  | 10                                                                                  | 10                                                                                  | 10                                                                                    | 10                                                                                    | 10                                                                                    |
| Preset       | .....                                                                               | .....                                                                               | .....                                                                               | .....                                                                               | .....                                                                               | .....                                                                                 | .....                                                                                 | .....                                                                                 |
| Word list    | .....                                                                               | .....                                                                               | .....                                                                               | .....                                                                               | .....                                                                               | .....                                                                                 | .....                                                                                 | .....                                                                                 |
| Order        | .....                                                                               | .....                                                                               | .....                                                                               | .....                                                                               | .....                                                                               | .....                                                                                 | .....                                                                                 | .....                                                                                 |
| Completed?   | <input type="checkbox"/>                                                            | <input type="checkbox"/>                                                            | <input type="checkbox"/>                                                            | <input type="checkbox"/>                                                            | <input type="checkbox"/>                                                            | <input type="checkbox"/>                                                              | <input type="checkbox"/>                                                              | <input type="checkbox"/>                                                              |

**Remarks**

\_\_\_\_\_

**2.11.9. PROTOCOL DEVIATIONS**

Were there any protocol deviations?  Yes  No

**Remarks**

\_\_\_\_\_

**2.11.10. DEVICE DEFICIENCIES**

Were there any device deficiencies?  Yes  No

**Remarks**

\_\_\_\_\_

**2.11.11. ADVERSE EVENTS**

Checked and acted on adverse events?  Yes  No

**Remarks**

\_\_\_\_\_

**General remarks**

\_\_\_\_\_

ELEPHANT (METC 18-028) Version: 3.2 Name investigator: \_\_\_\_\_ Signature: \_\_\_\_\_

SUBJECT ID: \_\_\_\_\_ SEEN BY MONITOR: \_\_\_\_\_ DATE: \_\_\_\_/\_\_\_\_/\_\_\_\_

## 2.12. Visit F11 (week 12)

Date:

Bimodal user:  Yes  No, because.....

### 2.12.1. LISTENING EFFORT

|                                           | Practice                 | Test                     | Test                     | Test                     | Test                     |
|-------------------------------------------|--------------------------|--------------------------|--------------------------|--------------------------|--------------------------|
| Listening                                 | CI / CIHA                | CI                       | CI                       | CIHA                     | CIHA                     |
| CI processor                              | △ / ○                    | △                        | ○                        | △                        | ○                        |
| CI program                                | .....                    | .....                    | .....                    | .....                    | .....                    |
| HA program                                | Off / bimodal            | HA off                   |                          | Bimodal fit              | Bimodal fit              |
| N                                         | 1                        | 5                        | 5                        | 5                        | 5                        |
| SRT input (in dB SNR)<br>-> See visit F10 | .....<br>.....           | .....<br>.....           | .....<br>.....           | .....<br>.....           | .....<br>.....           |
| Order                                     | .....                    | .....                    | .....                    | .....                    | .....                    |
| Completed?                                | <input type="checkbox"/> | <input type="checkbox"/> | <input type="checkbox"/> | <input type="checkbox"/> | <input type="checkbox"/> |

Remarks

### 2.12.2. LOUDNESS SCALING

|               | Test                     | Test                     | Test                     |
|---------------|--------------------------|--------------------------|--------------------------|
| Listening     | CI                       | CI                       | HA                       |
| CI processor  | △                        | ○                        |                          |
| CI program    | .....                    | .....                    | CI off                   |
| HA program    | HA off                   |                          | Bimodal fit              |
| N frequencies | 4                        | 4                        | 4                        |
| Order         | .....                    | .....                    | .....                    |
| Completed?    | <input type="checkbox"/> | <input type="checkbox"/> | <input type="checkbox"/> |

Remarks

**2.12.3. SMRT**

|              | Test                     | Retest                   | Test                     | Retest                   |
|--------------|--------------------------|--------------------------|--------------------------|--------------------------|
| Listening    | CI                       | CI                       | CI                       | CI                       |
| CI processor | △                        | △                        | ○                        | ○                        |
| CI program   | .....                    |                          | .....                    |                          |
| HA program   | HA turned off            |                          |                          |                          |
| Completed?   | <input type="checkbox"/> | <input type="checkbox"/> | <input type="checkbox"/> | <input type="checkbox"/> |

**Remarks**

.....

**2.12.4. PREFERENCE SCALES**

Preference scales (i03) completed?  Yes  No

**2.12.5. FITTING**

Particularities from previous fitting to be taken into account?  No  Yes, see fitting form

Fitting form (i02) completed?  Yes  No

Particularities relevant for next fitting?  No  Yes, note on fitting form

Compliance forms completed?  Yes  No

Consequences of CI compliance measurements, based on calculations (fitting form) and cut-off points (Appendix Compliance):

- Study continuation  Removed from CI per protocol population
- Early terminated and transferred to clinical care

**Remarks**

.....

**2.12.6. SPEECH THERAPY**

Particularities from speech therapy to be taken into account?  No  Yes, note here

.....

**Remarks**

.....

**BREAK**



**2.12.7. SPEECH AUDIOMETRY**

|                | Test                     |                          |                          | Retest                   | Test                     |                          |                          | Retest                   |
|----------------|--------------------------|--------------------------|--------------------------|--------------------------|--------------------------|--------------------------|--------------------------|--------------------------|
| Listening      | CI                       |                          |                          | CI                       | CI                       |                          |                          | CI                       |
| CI processor   | △                        |                          |                          | △                        | ○                        |                          |                          | ○                        |
| CI program     | .....                    |                          |                          | .....                    |                          |                          |                          |                          |
| HA program     | HA turned off            |                          |                          |                          |                          |                          |                          |                          |
| Level (dB SPL) | 75                       | 65                       | 55                       | 65                       | 75                       | 65                       | 55                       | 65                       |
| Completed?     | <input type="checkbox"/> | <input type="checkbox"/> | <input type="checkbox"/> | <input type="checkbox"/> | <input type="checkbox"/> | <input type="checkbox"/> | <input type="checkbox"/> | <input type="checkbox"/> |

**Remarks**

**2.12.8. MATRIX IN QUIET**

|               | Practice                 |                          | Test                     | Retest                   | Test                     | Retest                   |
|---------------|--------------------------|--------------------------|--------------------------|--------------------------|--------------------------|--------------------------|
| Listening     | CI                       |                          | CI                       | CI                       | CI                       | CI                       |
| CI processor  | △ / ○                    |                          | △                        | △                        | ○                        | ○                        |
| CI program    | .....                    |                          | .....                    |                          | .....                    |                          |
| HA program    | HA off                   |                          |                          |                          |                          |                          |
| N sentences   | 10                       | 10                       | 10                       | 10                       | 10                       | 10                       |
| Word list nr. | .....                    | .....                    | .....                    | .....                    | .....                    | .....                    |
| Order         | 1                        |                          | .....                    | .....                    | .....                    | .....                    |
| Completed?    | <input type="checkbox"/> | <input type="checkbox"/> | <input type="checkbox"/> | <input type="checkbox"/> | <input type="checkbox"/> | <input type="checkbox"/> |

**Remarks**

**2.12.9. MATRIX IN NOISE**

|                                       | Practice                 |                          | Test                     | Retest                   | Test                     | Retest                   |
|---------------------------------------|--------------------------|--------------------------|--------------------------|--------------------------|--------------------------|--------------------------|
| Listening                             | CI                       |                          | CI                       | CI                       | CI                       | CI                       |
| CI processor                          | △ / ○                    |                          | △                        | △                        | ○                        | ○                        |
| CI program                            | .....                    |                          | .....                    |                          | .....                    |                          |
| HA program                            | HA off                   |                          |                          |                          |                          |                          |
| N sentences                           | 10                       | 10                       | 10                       | 10                       | 10                       | 10                       |
| Word list nr.                         | .....                    | .....                    | .....                    | .....                    | .....                    | .....                    |
| Order                                 | 1                        |                          | .....                    | .....                    | .....                    | .....                    |
| Completed?                            | <input type="checkbox"/> | <input type="checkbox"/> | <input type="checkbox"/> | <input type="checkbox"/> | <input type="checkbox"/> | <input type="checkbox"/> |
| <b>Test result</b><br>(SRT in dB SNR) | .....                    | .....                    | .....                    | .....                    | .....                    | .....                    |
| <b>Mean result</b><br>(SRT in dB SNR) |                          |                          | .....                    |                          | .....                    |                          |

**Remarks**

**BREAK**

**2.12.10. QUESTIONNAIRES**

|                                 |                          |
|---------------------------------|--------------------------|
|                                 | Returned and checked?    |
| Date                            | ...../...../.....        |
| Sound quality descriptors (I11) | <input type="checkbox"/> |

**Remarks**

**2.12.11. PROTOCOL DEVIATIONS**

Were there any protocol deviations?  Yes  No

**Remarks**

SUBJECT ID: \_\_\_\_\_ SEEN BY MONITOR: \_\_\_\_\_ DATE: \_\_\_\_/\_\_\_\_/\_\_\_\_

**2.12.12. DEVICE DEFICIENCIES**

Were there any device deficiencies?  Yes  No

**Remarks**

\_\_\_\_\_

**2.12.13. ADVERSE EVENTS**

Checked and acted on adverse events?  Yes  No

**Remarks**

\_\_\_\_\_

**General remarks**

\_\_\_\_\_

ELEPHANT (METC 18-028) Version: 3.2 Name investigator: \_\_\_\_\_ Signature: \_\_\_\_\_

SUBJECT ID: \_\_\_\_\_ SEEN BY MONITOR: \_\_\_\_\_ DATE: \_\_\_\_/\_\_\_\_/\_\_\_\_

### 2.13. Visit F12 (week 16)

Date:

Bimodal user:  Yes  No, because.....

#### 2.13.1. PREFERENCE SCALES

Preference scales (i03) completed?  Yes  No

#### 2.13.2. CHECK-UP FITTING

Fitting form datalogging & impedances (i02) completed?  Yes  No

Compliance forms completed?  Yes  No

**Remarks**

#### 2.13.3. SPEECH AUDIOMETRY

|                | Test                     |                          |                          | Retest                   |                          | Test                     |                          |                          | Retest                   |                          |
|----------------|--------------------------|--------------------------|--------------------------|--------------------------|--------------------------|--------------------------|--------------------------|--------------------------|--------------------------|--------------------------|
| Listening      | CI                       |                          |                          | CI                       |                          | CI                       |                          |                          | CI                       |                          |
| CI processor   | △                        |                          |                          | △                        |                          | ○                        |                          |                          | ○                        |                          |
| CI program     | .....                    |                          |                          |                          | .....                    |                          |                          |                          |                          |                          |
| HA program     | HA turned off            |                          |                          |                          |                          |                          |                          |                          |                          |                          |
| Level (dB SPL) | 75                       | 65                       | 55                       | 65                       | 75                       | 65                       | 55                       | 65                       |                          |                          |
| Completed?     | <input type="checkbox"/> | <input type="checkbox"/> | <input type="checkbox"/> | <input type="checkbox"/> | <input type="checkbox"/> | <input type="checkbox"/> | <input type="checkbox"/> | <input type="checkbox"/> | <input type="checkbox"/> | <input type="checkbox"/> |

**Remarks**

#### 2.13.4. MATRIX IN QUIET

|               | Practice                 |                          | Test                     |                          | Retest                   |                          | Test                     |                          | Retest                   |                          |
|---------------|--------------------------|--------------------------|--------------------------|--------------------------|--------------------------|--------------------------|--------------------------|--------------------------|--------------------------|--------------------------|
| Listening     | CI                       |                          | CI                       |                          | CI                       |                          | CI                       |                          | CI                       |                          |
| CI processor  | △ / ○                    |                          | △                        |                          | △                        |                          | ○                        |                          | ○                        |                          |
| CI program    | .....                    |                          | .....                    |                          |                          |                          | .....                    |                          |                          |                          |
| HA program    | HA off                   |                          |                          |                          |                          |                          |                          |                          |                          |                          |
| N sentences   | 10                       | 10                       | 10                       |                          | 10                       |                          | 10                       |                          | 10                       |                          |
| Word list nr. | .....                    | .....                    | .....                    |                          | .....                    |                          | .....                    |                          | .....                    |                          |
| Order         | 1                        |                          | .....                    |                          | .....                    |                          | .....                    |                          | .....                    |                          |
| Completed?    | <input type="checkbox"/> | <input type="checkbox"/> | <input type="checkbox"/> | <input type="checkbox"/> | <input type="checkbox"/> | <input type="checkbox"/> | <input type="checkbox"/> | <input type="checkbox"/> | <input type="checkbox"/> | <input type="checkbox"/> |

**Remarks**

---

SUBJECT ID: \_\_\_\_\_ SEEN BY MONITOR: \_\_\_\_\_ DATE: \_\_\_\_/\_\_\_\_/\_\_\_\_

**2.13.5. MATRIX IN NOISE**

|               | Practice                 |                          | Test                     | Retest                   | Test                     | Retest                   |
|---------------|--------------------------|--------------------------|--------------------------|--------------------------|--------------------------|--------------------------|
| Listening     | CI                       |                          | CI                       | CI                       | CI                       | CI                       |
| CI processor  | △ / ○                    |                          | △                        | △                        | ○                        | ○                        |
| CI program    | .....                    |                          | .....                    |                          | .....                    |                          |
| HA program    | HA turned off            |                          |                          |                          |                          |                          |
| N sentences   | 10                       | 10                       | 10                       | 10                       | 10                       | 10                       |
| Word list nr. | .....                    | .....                    | .....                    | .....                    | .....                    | .....                    |
| Order         | 1                        |                          | .....                    | .....                    | .....                    | .....                    |
| Completed?    | <input type="checkbox"/> | <input type="checkbox"/> | <input type="checkbox"/> | <input type="checkbox"/> | <input type="checkbox"/> | <input type="checkbox"/> |

**Remarks**

**2.13.6. DATA MANAGEMENT CHECK-UP**

Digital data complete and correctly archived on network drive?  Yes  No

→ If no, describe steps to be taken:  
 .....  
 .....

Source documents correctly archived in filing cabinet?  Yes  No

→ If no, describe steps to be taken:  
 .....  
 .....

**Remarks**

**2.13.7. PROTOCOL DEVIATIONS**

Were there any protocol deviations?  Yes  No

**Remarks**

**2.13.8. DEVICE DEFICIENCIES**

SUBJECT ID: \_\_\_\_\_ SEEN BY MONITOR: \_\_\_\_\_ DATE: \_\_\_\_/\_\_\_\_/\_\_\_\_

Were there any device deficiencies?  Yes  No

**Remarks**

\_\_\_\_\_

**2.13.9. ADVERSE EVENTS**

Checked and acted on adverse events?  Yes  No

Any signs of tinnitus?  Yes  No

If yes, on what side(s)  Left  Right

If yes, to what extent (VAS 0-10)? Left: ..... Right: .....

Any signs of vertigo?  Yes  No

Any signs of oscillopsia?  Yes  No

**Remarks**

\_\_\_\_\_

**General remarks**

\_\_\_\_\_

ELEPHANT (METC 18-028) Version: 3.2 Name investigator: \_\_\_\_\_ Signature: \_\_\_\_\_

SUBJECT ID: \_\_\_\_\_ SEEN BY MONITOR: \_\_\_\_\_ DATE: \_\_\_\_/\_\_\_\_/\_\_\_\_



**2.14. Visit F13 (week 20)**

Date:

Bimodal user:  Yes  No, because.....

**2.14.1. PREFERENCE SCALES**

Preference scales (i03) completed?  Yes  No

**2.14.2. FITTING**

Particularities from previous fitting to be taken into account?  No  Yes, see fitting form

Fitting form (i02) completed?  Yes  No

Particularities relevant for next fitting?  No  Yes, note on fitting form

Compliance forms completed?  Yes  No

**Remarks**

**2.14.3. SPEECH AUDIOMETRY**

|                | Test                     |                          |                          | Retest                   |                          | Test                     |                          |                          | Retest                   |                          |  |  |
|----------------|--------------------------|--------------------------|--------------------------|--------------------------|--------------------------|--------------------------|--------------------------|--------------------------|--------------------------|--------------------------|--|--|
| Listening      | CI                       |                          |                          | CI                       |                          | CI                       |                          |                          | CI                       |                          |  |  |
| CI processor   | △                        |                          |                          | △                        |                          | ○                        |                          |                          | ○                        |                          |  |  |
| CI program     | .....                    |                          |                          |                          | .....                    |                          |                          |                          |                          |                          |  |  |
| HA program     | HA turned off            |                          |                          |                          |                          |                          |                          |                          |                          |                          |  |  |
| Level (dB SPL) | 75                       | 65                       | 55                       | 65                       | 75                       | 65                       | 55                       | 65                       |                          |                          |  |  |
| Completed?     | <input type="checkbox"/> | <input type="checkbox"/> | <input type="checkbox"/> | <input type="checkbox"/> | <input type="checkbox"/> | <input type="checkbox"/> | <input type="checkbox"/> | <input type="checkbox"/> | <input type="checkbox"/> | <input type="checkbox"/> |  |  |

**Remarks**

**2.14.4. MATRIX IN QUIET**

|               | Practice      |       | Test  |  | Retest |  | Test  |  | Retest |  |
|---------------|---------------|-------|-------|--|--------|--|-------|--|--------|--|
| Listening     | CI            |       | CI    |  | CI     |  | CI    |  | CI     |  |
| CI processor  | △ / ○         |       | △     |  | △      |  | ○     |  | ○      |  |
| CI program    | .....         |       | ..... |  |        |  | ..... |  |        |  |
| HA program    | HA turned off |       |       |  |        |  |       |  |        |  |
| N sentences   | 10            | 10    | 10    |  | 10     |  | 10    |  | 10     |  |
| Word list nr. | .....         | ..... | ..... |  | .....  |  | ..... |  | .....  |  |
| Order         | 1             |       | ..... |  | .....  |  | ..... |  | .....  |  |

SUBJECT ID: \_\_\_\_\_ SEEN BY MONITOR: \_\_\_\_\_ DATE: \_\_\_\_/\_\_\_\_/\_\_\_\_

|            |                          |                          |                          |                          |                          |                          |
|------------|--------------------------|--------------------------|--------------------------|--------------------------|--------------------------|--------------------------|
| Completed? | <input type="checkbox"/> | <input type="checkbox"/> | <input type="checkbox"/> | <input type="checkbox"/> | <input type="checkbox"/> | <input type="checkbox"/> |
|------------|--------------------------|--------------------------|--------------------------|--------------------------|--------------------------|--------------------------|

**Remarks**

**2.14.5. MATRIX IN NOISE**

|               | Practice                 |                          | Test                     | Retest                   | Test                     | Retest                   |
|---------------|--------------------------|--------------------------|--------------------------|--------------------------|--------------------------|--------------------------|
| Listening     | CI                       |                          | CI                       | CI                       | CI                       | CI                       |
| CI processor  | △ / ○                    |                          | △                        | △                        | ○                        | ○                        |
| HA program    | HA turned off            |                          |                          |                          |                          |                          |
| N sentences   | 10                       | 10                       | 10                       | 10                       | 10                       | 10                       |
| Word list nr. | .....                    | .....                    | .....                    | .....                    | .....                    | .....                    |
| Order         | 1                        |                          | .....                    | .....                    | .....                    | .....                    |
| Completed?    | <input type="checkbox"/> | <input type="checkbox"/> | <input type="checkbox"/> | <input type="checkbox"/> | <input type="checkbox"/> | <input type="checkbox"/> |

**Remarks**

**2.14.6. PROTOCOL DEVIATIONS**

Were there any protocol deviations?  Yes  No

**Remarks**

**2.14.7. DEVICE DEFICIENCIES**

Were there any device deficiencies?  Yes  No

**Remarks**

**2.14.8. ADVERSE EVENTS**

Checked and acted on adverse events?  Yes  No

**Remarks**

SUBJECT ID: \_\_\_\_\_ SEEN BY MONITOR: \_\_\_\_\_ DATE: \_\_\_\_/\_\_\_\_/\_\_\_\_

**General remarks**

ELEPHANT (METC 18-028) Version: 3.2 Name investigator: \_\_\_\_\_ Signature: \_\_\_\_\_

SUBJECT ID: \_\_\_\_\_ SEEN BY MONITOR: \_\_\_\_\_ DATE: \_\_\_\_/\_\_\_\_/\_\_\_\_

**2.15. Visit F14 (week 26)**

Date:

Bimodal user:  Yes  No, because.....

**2.15.1. TONE AUDIOMETRY**

|               | CI                       |                          | HA                       | Unaided                  |                          |
|---------------|--------------------------|--------------------------|--------------------------|--------------------------|--------------------------|
|               | △                        | ○                        |                          | L                        | R                        |
| Processor/Ear | △                        | ○                        | Bimodal fit              | L                        | R                        |
| CI program    | .....                    | .....                    | CI off                   | CI off                   | CI off                   |
| Completed?    | <input type="checkbox"/> | <input type="checkbox"/> | <input type="checkbox"/> | <input type="checkbox"/> | <input type="checkbox"/> |

**Remarks**

.....

**2.15.2. SPEECH AUDIOMETRY**

|            | Unaided                  |                          |
|------------|--------------------------|--------------------------|
|            | L                        | R                        |
| Ear        |                          |                          |
| Completed? | <input type="checkbox"/> | <input type="checkbox"/> |

**Remarks**

.....

**2.15.3. PREFERENCE SCALES**

Preference scales (i03) completed?  Yes  No

**2.15.4. FITTING**

Program choice after shared decision making:  Standard program  Natural program

Fitting form (i02) completed?  Yes  No

Compliance forms completed?  Yes  No

Consequences of HA compliance measurements, based on calculations (fitting form) and cut-off points (Appendix Compliance):

Study continuation  Removed from HA population/bimodal group?

ECAP completed?  Yes  No

Spare processor taken in and stored?  No  Yes -> S/N: .....

Remarks

.....

**2.15.5. QUESTIONNAIRES**

|                                 | Given to subject         | To be returned |
|---------------------------------|--------------------------|----------------|
| Date                            | ...../...../.....        | Visit F15      |
| SSQ-12 (I07)                    | <input type="checkbox"/> |                |
| HUI-3 (I08)                     | <input type="checkbox"/> |                |
| ICECAP-A (09)                   | <input type="checkbox"/> |                |
| Sound quality descriptors (I11) | <input type="checkbox"/> |                |

Remarks

.....

**BREAK**

**2.15.6. PROTOCOL DEVIATIONS**

Were there any protocol deviations?  Yes  No

Remarks

.....

SUBJECT ID: \_\_\_\_\_ SEEN BY MONITOR: \_\_\_\_\_ DATE: \_\_\_\_/\_\_\_\_/\_\_\_\_

**2.15.7. DEVICE DEFICIENCIES**

Were there any device deficiencies?  Yes  No

**Remarks**

\_\_\_\_\_

**2.15.8. ADVERSE EVENTS**

Checked and acted on adverse events?  Yes  No

**Remarks**

\_\_\_\_\_

**General remarks**

\_\_\_\_\_

ELEPHANT (METC 18-028) Version: 3.2 Name investigator: \_\_\_\_\_ Signature: \_\_\_\_\_

SUBJECT ID: \_\_\_\_\_ SEEN BY MONITOR: \_\_\_\_\_ DATE: \_\_\_\_/\_\_\_\_/\_\_\_\_



**2.16. Visit F15 (week 26)**

Date:

Bimodal user:  Yes  No

**2.16.1. SPEECH AUDIOMETRY**

|                | Test                     |                          |                          | Retest                   | Test                     |                          |                          | Retest                   | Test                     |                          |                          | Retest                   |
|----------------|--------------------------|--------------------------|--------------------------|--------------------------|--------------------------|--------------------------|--------------------------|--------------------------|--------------------------|--------------------------|--------------------------|--------------------------|
| Listening      | CI                       |                          |                          | CI                       | HA                       |                          |                          | HA                       | CIHA                     |                          |                          | CIHA                     |
| CI processor   | Preferred                |                          |                          | Preferred                | CI turned off            |                          |                          |                          | Preferred                |                          |                          | Preferred                |
| CI program     | .....                    |                          |                          |                          | CI turned off            |                          |                          |                          | .....                    |                          |                          |                          |
| HA program     | HA turned off            |                          |                          |                          | Bimodal fit              |                          |                          |                          | Bimodal fit              |                          |                          | Bimodal fit              |
| Level (dB SPL) | 75                       | 65                       | 55                       | 65                       | 75                       | 65                       | 55                       | 65                       | 75                       | 65                       | 55                       | 65                       |
| Completed?     | <input type="checkbox"/> | <input type="checkbox"/> | <input type="checkbox"/> | <input type="checkbox"/> | <input type="checkbox"/> | <input type="checkbox"/> | <input type="checkbox"/> | <input type="checkbox"/> | <input type="checkbox"/> | <input type="checkbox"/> | <input type="checkbox"/> | <input type="checkbox"/> |

**Remarks**

.....

**2.16.2. MATRIX IN QUIET**

|              | Practice                 |                          | Test                     | Retest                   |
|--------------|--------------------------|--------------------------|--------------------------|--------------------------|
| Listening    | CI                       |                          | CI                       | CI                       |
| CI processor | Preferred                |                          | Preferred                | Preferred                |
| CI program   | .....                    |                          | .....                    |                          |
| HA program   | HA turned off            |                          |                          |                          |
| N sentences  | 10                       | 10                       | 10                       | 10                       |
| Word list nr | .....                    | .....                    | .....                    | .....                    |
| Order        | 1                        |                          | 2                        | 3                        |
| Completed?   | <input type="checkbox"/> | <input type="checkbox"/> | <input type="checkbox"/> | <input type="checkbox"/> |

**Remarks**

.....

**2.16.3. MATRIX IN NOISE**

|                                       | Practice                 |                          | Test                     | Retest                   | Test                     | Retest                   |
|---------------------------------------|--------------------------|--------------------------|--------------------------|--------------------------|--------------------------|--------------------------|
| Listening                             | CI / CIHA                |                          | CI                       | CI                       | CIHA                     | CIHA                     |
| CI processor                          | Preferred                |                          | Preferred                | Preferred                | Preferred                | Preferred                |
| CI program                            | .....                    |                          | .....                    |                          | .....                    |                          |
| HA program                            | Off / bimodal            |                          | HA turned off            |                          | Bimodal fit              | Bimodal fit              |
| N sentences                           | 10                       | 10                       | 10                       | 10                       | 10                       | 10                       |
| Word list nr                          | .....                    | .....                    | .....                    | .....                    | .....                    | .....                    |
| Order                                 | .....                    |                          | .....                    | .....                    | .....                    | .....                    |
| Completed?                            | <input type="checkbox"/> | <input type="checkbox"/> | <input type="checkbox"/> | <input type="checkbox"/> | <input type="checkbox"/> | <input type="checkbox"/> |
| <b>Test result</b><br>(SRT in dB SNR) | .....                    | .....                    | .....                    | .....                    | .....                    | .....                    |
| <b>Mean result</b><br>(SRT in dB SNR) |                          |                          | .....                    |                          | .....                    |                          |

**Remarks**

.....

**BREAK**

**2.16.4. QUESTIONNAIRES**

|                                 | Returned and checked     |
|---------------------------------|--------------------------|
| Date                            | ...../...../.....        |
| SSQ-12 (I07)                    | <input type="checkbox"/> |
| HUI-3 (I08)                     | <input type="checkbox"/> |
| ICECAP-A (09)                   | <input type="checkbox"/> |
| Sound quality descriptors (I11) | <input type="checkbox"/> |

**Remarks**

.....

**2.16.5. MATRIX IN NOISE SPATIAL**

|                   | Test                     | Retest                   | Test                     | Retest                   | Test                     | Retest                   | Test                     | Retest                   |
|-------------------|--------------------------|--------------------------|--------------------------|--------------------------|--------------------------|--------------------------|--------------------------|--------------------------|
| Listening         | CI                       | CI                       | CI                       | CI                       | CIHA                     | CIHA                     | CIHA                     | CIHA                     |
| Spatial           | SONCI                    | SONCI                    | SONHA                    | SONHA                    | SONCI                    | SONCI                    | SONHA                    | SONHA                    |
| CI processor      | Preferred                | Preferred                | Preferred                | Preferred                | Preferred                | Preferred                | Preferred                | Preferred                |
| CI program        | .....                    |                          | .....                    |                          | .....                    |                          | .....                    |                          |
| HA program        | HA turned off            |                          |                          |                          | Bimodal fit              | Bimodal fit              | Bimodal fit              | Bimodal fit              |
| N sentences       | 10                       | 10                       | 10                       | 10                       | 10                       | 10                       | 10                       | 10                       |
| Hammerfall Preset | .....                    | .....                    | .....                    | .....                    | .....                    | .....                    | .....                    | .....                    |
| Word list nr      | .....                    | .....                    | .....                    | .....                    | .....                    | .....                    | .....                    | .....                    |
| Order             | .....                    | .....                    | .....                    | .....                    | .....                    | .....                    | .....                    | .....                    |
| Completed?        | <input type="checkbox"/> | <input type="checkbox"/> | <input type="checkbox"/> | <input type="checkbox"/> | <input type="checkbox"/> | <input type="checkbox"/> | <input type="checkbox"/> | <input type="checkbox"/> |

**Remarks**

.....

**BREAK**

**2.16.6. LISTENING EFFORT**

|                       |                          |                          |                          |
|-----------------------|--------------------------|--------------------------|--------------------------|
|                       | Practice                 | Test                     | Test                     |
| Listening             | CI / CIHA                | CI                       | CIHA                     |
| CI processor          | Preferred                | Preferred                | Preferred                |
| CI program            | .....                    | .....                    | .....                    |
| HA program            | Off / bimodal            | HA turned off            | Bimodal fit              |
| SRT input (in dB SNR) | .....<br>.....           | .....<br>.....           | .....<br>.....           |
| Order                 | .....                    | .....                    | .....                    |
| Completed?            | <input type="checkbox"/> | <input type="checkbox"/> | <input type="checkbox"/> |

**Remarks**

.....

**2.16.7. LOUDNESS SCALING**

|              |                          |                          |
|--------------|--------------------------|--------------------------|
|              | Test                     | Test                     |
| Listening    | CI                       | HA                       |
| CI processor | Preferred                | CI turned off            |
| CI program   | .....                    | CI turned off            |
| HA program   | HA turned off            | Bimodal fit              |
| N questions  | 4                        | 4                        |
| Word list nr | .....                    | .....                    |
| Order        | .....                    | .....                    |
| Completed?   | <input type="checkbox"/> | <input type="checkbox"/> |

**Remarks**

.....

**2.16.8. SMRT**

|              | Test                     | Retest                   | Test                     | Retest                   |
|--------------|--------------------------|--------------------------|--------------------------|--------------------------|
| Listening    | CI                       | CI                       | HA                       | HA                       |
| CI processor | Preferred                | Preferred                | CI turned off            |                          |
| CI program   | .....                    |                          | CI turned off            |                          |
| HA program   | HA turned off            |                          | Bimodal fit              |                          |
| Completed?   | <input type="checkbox"/> | <input type="checkbox"/> | <input type="checkbox"/> | <input type="checkbox"/> |

**Remarks**

.....

**2.16.9. PROTOCOL DEVIATIONS**

Were there any protocol deviations?  Yes  No

**Remarks**

.....

**2.16.10. DEVICE DEFICIENCIES**

Were there any device deficiencies?  Yes  No

**Remarks**

.....

**2.16.11. ADVERSE EVENTS**

Checked and acted on adverse events?  Yes  No

**Remarks**

.....

**General remarks**

.....

### 3. Second phase

#### 3.1. Visit S1 (week 30)

Date:

Bimodal user:  Yes  No, because.....

**3.1.1. PREFERENCE SCALES**

Preference scales (i04) completed?  Yes  No

**3.1.2. FITTING**

Particularities from previous fitting to be taken into account?  No  Yes, see fitting form

Fitting form (i02) completed?  Yes  No

Compliance forms completed?  Yes  No

Particularities relevant for next fitting?  No  Yes, note on fitting form

**Remarks**

**3.1.3. QUESTIONNAIRES**

|                                 | Given to subject         | To be returned |
|---------------------------------|--------------------------|----------------|
| Date                            | ...../...../.....        | Visit T1       |
| SSQ-12 (I07)                    | <input type="checkbox"/> |                |
| HUI-3 (I08)                     | <input type="checkbox"/> |                |
| ICECAP-A (09)                   | <input type="checkbox"/> |                |
| Sound quality descriptors (I11) | <input type="checkbox"/> |                |

**Remarks**

**3.1.4. SPEECH AUDIOMETRY**

|                | Test                     |                          |                          | Retest                   | Test                     |                          |                          | Retest                   | Test                     |                          |                          | Retest                   |
|----------------|--------------------------|--------------------------|--------------------------|--------------------------|--------------------------|--------------------------|--------------------------|--------------------------|--------------------------|--------------------------|--------------------------|--------------------------|
| Listening      | CI                       |                          |                          | CI                       | HA                       |                          |                          | HA                       | CIHA                     |                          |                          | CIHA                     |
| CI processor   | Preferred                |                          |                          | Preferred                | CI turned off            |                          |                          |                          | Preferred                |                          |                          | Preferred                |
| CI program     | .....                    |                          |                          |                          | CI turned off            |                          |                          |                          | .....                    |                          |                          |                          |
| HA program     | HA turned off            |                          |                          |                          | Loudness fit             |                          |                          |                          | Loudness fit             |                          |                          | Loudness fit             |
| Level (dB SPL) | 75                       | 65                       | 55                       | 65                       | 75                       | 65                       | 55                       | 65                       | 75                       | 65                       | 55                       | 65                       |
| Completed?     | <input type="checkbox"/> | <input type="checkbox"/> | <input type="checkbox"/> | <input type="checkbox"/> | <input type="checkbox"/> | <input type="checkbox"/> | <input type="checkbox"/> | <input type="checkbox"/> | <input type="checkbox"/> | <input type="checkbox"/> | <input type="checkbox"/> | <input type="checkbox"/> |

**Remarks**

.....

**3.1.5. MATRIX IN QUIET**

|              | Practice                 |                          | Test                     | Retest                   |
|--------------|--------------------------|--------------------------|--------------------------|--------------------------|
| Listening    | CI                       |                          | CI                       | CI                       |
| CI processor | Preferred                |                          | Preferred                | Preferred                |
| CI program   | .....                    |                          | .....                    |                          |
| HA program   | HA turned off            |                          |                          |                          |
| N sentences  | 10                       | 10                       | 10                       | 10                       |
| Word list nr | .....                    | .....                    | .....                    | .....                    |
| Order        | 1                        |                          | 2                        | 3                        |
| Completed?   | <input type="checkbox"/> | <input type="checkbox"/> | <input type="checkbox"/> | <input type="checkbox"/> |

**Remarks**

.....



**3.1.6. MATRIX IN NOISE**

|                                       | Practice                 |                          | Test                     | Retest                   | Test                     | Retest                   |
|---------------------------------------|--------------------------|--------------------------|--------------------------|--------------------------|--------------------------|--------------------------|
| Listening                             | CI / CIHA                |                          | CI                       | CI                       | CIHA                     | CIHA                     |
| CI processor                          | Preferred                |                          | Preferred                | Preferred                | Preferred                | Preferred                |
| CI program                            | .....                    |                          | .....                    |                          | .....                    |                          |
| HA program                            | Off / loudness           |                          | HA turned off            |                          | Loudness fit             | Loudness fit             |
| N sentences                           | 10                       | 10                       | 10                       | 10                       | 10                       | 10                       |
| Word list nr                          | .....                    | .....                    | .....                    | .....                    | .....                    | .....                    |
| Order                                 | .....                    |                          | .....                    | .....                    | .....                    | .....                    |
| Completed?                            | <input type="checkbox"/> | <input type="checkbox"/> | <input type="checkbox"/> | <input type="checkbox"/> | <input type="checkbox"/> | <input type="checkbox"/> |
| <b>Test result</b><br>(SRT in dB SNR) | .....                    | .....                    | .....                    | .....                    | .....                    | .....                    |
| <b>Mean result</b><br>(SRT in dB SNR) |                          |                          | .....                    |                          | .....                    |                          |

**Remarks**

---

**BREAK**

**3.1.7. MATRIX IN NOISE SPATIAL**

|                   | Test                     | Retest                   | Test                     | Retest                   | Test                     | Retest                   | Test                     | Retest                   |
|-------------------|--------------------------|--------------------------|--------------------------|--------------------------|--------------------------|--------------------------|--------------------------|--------------------------|
| Listening         | CI                       | CI                       | CI                       | CI                       | CIHA                     | CIHA                     | CIHA                     | CIHA                     |
| Spatial           | SONCI                    | SONCI                    | SONHA                    | SONHA                    | SONCI                    | SONCI                    | SONHA                    | SONHA                    |
| CI processor      | Preferred                | Preferred                | Preferred                | Preferred                | Preferred                | Preferred                | Preferred                | Preferred                |
| CI program        | .....                    |                          | .....                    |                          | .....                    |                          | .....                    |                          |
| HA program        | HA turned off            |                          |                          |                          | Loudness fit             | Loudness fit             | Loudness fit             | Loudness fit             |
| N sentences       | 10                       | 10                       | 10                       | 10                       | 10                       | 10                       | 10                       | 10                       |
| Hammerfall Preset | .....                    | .....                    | .....                    | .....                    | .....                    | .....                    | .....                    | .....                    |
| Word list nr      | .....                    | .....                    | .....                    | .....                    | .....                    | .....                    | .....                    | .....                    |
| Order             | .....                    | .....                    | .....                    | .....                    | .....                    | .....                    | .....                    | .....                    |
| Completed?        | <input type="checkbox"/> | <input type="checkbox"/> | <input type="checkbox"/> | <input type="checkbox"/> | <input type="checkbox"/> | <input type="checkbox"/> | <input type="checkbox"/> | <input type="checkbox"/> |

**Remarks**

---

**3.1.8. LISTENING EFFORT**

|                       | Practice                 | Test                     | Test                     |
|-----------------------|--------------------------|--------------------------|--------------------------|
| Listening             | CI / CIHA                | CI                       | CIHA                     |
| CI processor          | Preferred                | Preferred                | Preferred                |
| CI program            | .....                    | .....                    | .....                    |
| HA program            | Off / Loudness fit       | HA turned off            | Loudness fit             |
| SRT input (in dB SNR) | .....<br>.....           | .....<br>.....           | .....<br>.....           |
| Order                 | .....                    | .....                    | .....                    |
| Completed?            | <input type="checkbox"/> | <input type="checkbox"/> | <input type="checkbox"/> |

**Remarks**

.....

**3.1.9. LOUDNESS SCALING**

|              | Test                     | Test                     |
|--------------|--------------------------|--------------------------|
| Listening    | CI                       | HA                       |
| CI processor | Preferred                | CI turned off            |
| CI program   | .....                    | CI turned off            |
| HA program   | HA turned off            | Loudness fit             |
| N questions  | 4                        | 4                        |
| Word list nr | .....                    | .....                    |
| Order        | .....                    | .....                    |
| Completed?   | <input type="checkbox"/> | <input type="checkbox"/> |

**Remarks**

.....

SUBJECT ID: \_\_\_\_\_ SEEN BY MONITOR: \_\_\_\_\_ DATE: \_\_\_\_/\_\_\_\_/\_\_\_\_

**3.1.10. DATA MANAGEMENT CHECK-UP**

Digital data complete and correctly archived on network drive?  Yes  No

→ If no, describe steps to be taken:

.....  
.....

Source documents correctly archived in filing cabinet?  Yes  No

→ If no, describe steps to be taken:

.....  
.....

**Remarks**

.....

**3.1.11. PROTOCOL DEVIATIONS**

Were there any protocol deviations?  Yes  No

**Remarks**

.....

**3.1.12. DEVICE DEFICIENCIES**

Were there any device deficiencies?  Yes  No

**Remarks**

.....

**3.1.13. ADVERSE EVENTS**

Checked and acted on adverse events?  Yes  No

Any signs of tinnitus?  Yes  No

If yes, on what side(s)  Left  Right

If yes, to what extent (VAS 0-10)? Left: ..... Right: .....

Any signs of vertigo  Yes  No

Any signs of oscillopsia?  Yes  No

**Remarks**

\_\_\_\_\_

**General remarks**

\_\_\_\_\_

ELEPHANT (METC 18-028) Version: 3.2 Name investigator: \_\_\_\_\_ Signature: \_\_\_\_\_

SUBJECT ID: \_\_\_\_\_ SEEN BY MONITOR: \_\_\_\_\_ DATE: \_\_\_\_/\_\_\_\_/\_\_\_\_

## 4. Third phase

### 4.1. Visit T1 (week 34)

Date:

...../...../.....

Bimodal user:

Yes

No, because.....

#### 4.1.1. TONE AUDIOMETRY

|            |                          |
|------------|--------------------------|
|            | HA                       |
| Program    | Loudness fit             |
| Completed? | <input type="checkbox"/> |

Remarks

.....

#### 4.1.2. SPEECH AUDIOMETRY

|                | Test                     |                          |                          | Retest                   | Test                     |                          |                          | Retest                   | Test                     |                          |                          | Retest                   |
|----------------|--------------------------|--------------------------|--------------------------|--------------------------|--------------------------|--------------------------|--------------------------|--------------------------|--------------------------|--------------------------|--------------------------|--------------------------|
| Listening      | CI                       |                          |                          | CI                       | HA                       |                          |                          | HA                       | CIHA                     |                          |                          | CIHA                     |
| CI processor   | Preferred                |                          |                          | Preferred                | CI turned off            |                          |                          |                          | Preferred                |                          |                          | Preferred                |
| CI program     | .....                    |                          |                          |                          | CI turned off            |                          |                          |                          | .....                    |                          |                          |                          |
| HA program     | HA turned off            |                          |                          |                          | Loudness fit             |                          |                          |                          | Loudness fit             |                          |                          | Loudness fit             |
| Level (dB SPL) | 75                       | 65                       | 55                       | 65                       | 75                       | 65                       | 55                       | 65                       | 75                       | 65                       | 55                       | 65                       |
| Completed?     | <input type="checkbox"/> | <input type="checkbox"/> | <input type="checkbox"/> | <input type="checkbox"/> | <input type="checkbox"/> | <input type="checkbox"/> | <input type="checkbox"/> | <input type="checkbox"/> | <input type="checkbox"/> | <input type="checkbox"/> | <input type="checkbox"/> | <input type="checkbox"/> |

Remarks

.....

**4.1.3. MATRIX IN QUIET**

|              | Practice                 |                          | Test                     | Retest                   |
|--------------|--------------------------|--------------------------|--------------------------|--------------------------|
| Listening    | CI                       |                          | CI                       | CI                       |
| CI processor | Preferred                |                          | Preferred                | Preferred                |
| CI program   | .....                    |                          | .....                    |                          |
| HA program   | HA turned off            |                          |                          |                          |
| N sentences  | 10                       | 10                       | 10                       | 10                       |
| Word list nr | .....                    | .....                    | .....                    | .....                    |
| Order        | 1                        |                          | 2                        | 3                        |
| Completed?   | <input type="checkbox"/> | <input type="checkbox"/> | <input type="checkbox"/> | <input type="checkbox"/> |

**Remarks**

.....

**4.1.4. MATRIX IN NOISE**

|                                    | Practice                 |                          | Test                     | Retest                   | Test                     | Retest                   |
|------------------------------------|--------------------------|--------------------------|--------------------------|--------------------------|--------------------------|--------------------------|
| Listening                          | CI / CIHA                |                          | CI                       | CI                       | CIHA                     | CIHA                     |
| CI processor                       | Preferred                |                          | Preferred                | Preferred                | Preferred                | Preferred                |
| CI program                         | .....                    |                          | .....                    |                          | .....                    |                          |
| HA program                         | Off / loudness           |                          | HA turned off            |                          | Loudness fit             | Loudness fit             |
| N sentences                        | 10                       | 10                       | 10                       | 10                       | 10                       | 10                       |
| Word list nr.                      | .....                    | .....                    | .....                    | .....                    | .....                    | .....                    |
| Order                              | .....                    | .....                    | .....                    | .....                    | .....                    | .....                    |
| Completed?                         | <input type="checkbox"/> | <input type="checkbox"/> | <input type="checkbox"/> | <input type="checkbox"/> | <input type="checkbox"/> | <input type="checkbox"/> |
| <b>Test result</b> (SRT in dB SNR) | .....                    |                          | .....                    | .....                    | .....                    | .....                    |
| <b>Mean result</b> (SRT in dB SNR) |                          |                          | .....                    |                          | .....                    |                          |

SUBJECT ID: \_\_\_\_\_ SEEN BY MONITOR: \_\_\_\_\_ DATE: \_\_\_\_/\_\_\_\_/\_\_\_\_



**Remarks**

\_\_\_\_\_

**4.1.5. QUESTIONNAIRES**

|                                 | Returned and checked     |
|---------------------------------|--------------------------|
| Date                            | ...../...../.....        |
| SSQ-12 (I07)                    | <input type="checkbox"/> |
| HUI-3 (I08)                     | <input type="checkbox"/> |
| ICECAP-A (09)                   | <input type="checkbox"/> |
| Sound quality descriptors (I11) | <input type="checkbox"/> |

**Remarks**

\_\_\_\_\_

**BREAK**

**4.1.6. MATRIX IN NOISE SPATIAL**

|                   |                          |                          |                          |                          |                          |                          |                          |                          |
|-------------------|--------------------------|--------------------------|--------------------------|--------------------------|--------------------------|--------------------------|--------------------------|--------------------------|
|                   | Test                     | Retest                   | Test                     | Retest                   | Test                     | Retest                   | Test                     | Retest                   |
| Listening         | CI                       | CI                       | CI                       | CI                       | CIHA                     | CIHA                     | CIHA                     | CIHA                     |
| Spatial           | SONCI                    | SONCI                    | SONHA                    | SONHA                    | SONCI                    | SONCI                    | SONHA                    | SONHA                    |
| CI processor      | Preferred                | Preferred                | Preferred                | Preferred                | Preferred                | Preferred                | Preferred                | Preferred                |
| CI program        | .....                    |                          | .....                    |                          | .....                    |                          | .....                    |                          |
| HA program        | HA turned off            |                          |                          |                          | Loudness fit             | Loudness fit             | Loudness fit             | Loudness fit             |
| N sentences       | 10                       | 10                       | 10                       | 10                       | 10                       | 10                       | 10                       | 10                       |
| Hammerfall Preset | .....                    | .....                    | .....                    | .....                    | .....                    | .....                    | .....                    | .....                    |
| Word list nr      | .....                    | .....                    | .....                    | .....                    | .....                    | .....                    | .....                    | .....                    |
| Order             | .....                    | .....                    | .....                    | .....                    | .....                    | .....                    | .....                    | .....                    |
| Completed?        | <input type="checkbox"/> | <input type="checkbox"/> | <input type="checkbox"/> | <input type="checkbox"/> | <input type="checkbox"/> | <input type="checkbox"/> | <input type="checkbox"/> | <input type="checkbox"/> |

**Remarks**

.....

**4.1.7. LISTENING EFFORT**

|                       |                |                |                |
|-----------------------|----------------|----------------|----------------|
|                       | Practice       | Test           | Test           |
| Listening             | CI / CIHA      | CI             | CIHA           |
| CI processor          | Preferred      | Preferred      | Preferred      |
| CI program            | .....          | .....          | .....          |
| HA program            | Off / loudness | HA turned off  | Loudness fit   |
| SRT input (in dB SNR) | .....<br>..... | .....<br>..... | .....<br>..... |
| Order                 | .....          | .....          | .....          |

SUBJECT ID: \_\_\_\_\_ SEEN BY MONITOR: \_\_\_\_\_ DATE: \_\_\_\_/\_\_\_\_/\_\_\_\_

|            |                          |                          |                          |
|------------|--------------------------|--------------------------|--------------------------|
| Completed? | <input type="checkbox"/> | <input type="checkbox"/> | <input type="checkbox"/> |
|------------|--------------------------|--------------------------|--------------------------|

**Remarks**

---

**4.1.8. LOUDNESS SCALING**

|              | Test                     | Test                     |
|--------------|--------------------------|--------------------------|
| Listening    | CI                       | HA                       |
| CI processor | Preferred                | CI turned off            |
| CI program   | .....                    | CI turned off            |
| HA program   | HA turned off            | Loudness fit             |
| N questions  | 4                        | 4                        |
| Word list nr | .....                    | .....                    |
| Order        | .....                    | .....                    |
| Completed?   | <input type="checkbox"/> | <input type="checkbox"/> |

**Remarks**

---

**4.1.9. SMRT**

|              | Test                     | Retest                   |
|--------------|--------------------------|--------------------------|
| Listening    | HA                       | HA                       |
| CI processor | CI turned off            |                          |
| CI program   | CI turned off            |                          |
| HA program   | Loudness fit             |                          |
| Completed?   | <input type="checkbox"/> | <input type="checkbox"/> |

**Remarks**

---

**BREAK**

**4.1.10. PREFERENCE SCALES**

Preference scales (i04 + i05) completed?  Yes  No

SUBJECT ID: \_\_\_\_\_ SEEN BY MONITOR: \_\_\_\_\_ DATE: \_\_\_\_/\_\_\_\_/\_\_\_\_

**4.1.11. FITTING**

Particularities from previous fitting to be taken into account?  No  Yes, .....

.....

Fitting form (i02) completed?  Yes  No

Particularities relevant for next fitting?  No  Yes, describe here and note on CRF's next visit

.....

**Remarks**

.....

**4.1.12. QUESTIONNAIRES**

|                                 | Given to subject         | To be returned |
|---------------------------------|--------------------------|----------------|
| Date                            | ...../...../.....        | Visit T2       |
| SSQ-12 (I07)                    | <input type="checkbox"/> |                |
| HUI-3 (I08)                     | <input type="checkbox"/> |                |
| ICECAP-A (09)                   | <input type="checkbox"/> |                |
| Sound quality descriptors (I11) | <input type="checkbox"/> |                |

**Remarks**

.....

**4.1.13. SPEECH AUDIOMETRY**

|                | Test                     |                          | Retest                   |                          |
|----------------|--------------------------|--------------------------|--------------------------|--------------------------|
| Listening      | CI                       |                          | CI                       |                          |
| CI processor   | Clinical                 |                          | Clinical                 |                          |
| CI program     | .....                    |                          |                          |                          |
| HA program     | HA turned off            |                          |                          |                          |
| Level (dB SPL) | 75                       | 65                       | 55                       | 65                       |
| Completed?     | <input type="checkbox"/> | <input type="checkbox"/> | <input type="checkbox"/> | <input type="checkbox"/> |

**Remarks**

.....

**4.1.14. MATRIX IN QUIET**

|               | Practice                 |                          | Test                     | Retest                   |
|---------------|--------------------------|--------------------------|--------------------------|--------------------------|
| Listening     | CI                       |                          | CI                       | CI                       |
| CI processor  | Clinical program         |                          | Clinical program         | Clinical program         |
| CI program    | .....                    |                          | .....                    |                          |
| HA program    | HA turned off            |                          |                          |                          |
| N sentences   | 10                       | 10                       | 10                       | 10                       |
| Word list nr. | .....                    |                          | .....                    | .....                    |
| Order         | 1                        |                          | 2                        | 3                        |
| Completed?    | <input type="checkbox"/> | <input type="checkbox"/> | <input type="checkbox"/> | <input type="checkbox"/> |

**Remarks**

---

**4.1.15. MATRIX IN NOISE**

|              | Practice                 |                          | Test                     | Retest                   |
|--------------|--------------------------|--------------------------|--------------------------|--------------------------|
| Listening    | CI                       |                          | CI                       | CI                       |
| CI processor | Clinical program         |                          | Clinical program         | Clinical program         |
| CI program   | .....                    |                          | .....                    |                          |
| HA program   | HA turned off            |                          |                          |                          |
| N sentences  | 10                       | 10                       | 10                       | 10                       |
| Word list nr | .....                    |                          | .....                    | .....                    |
| Order        | 1                        |                          | 2                        | 3                        |
| Completed?   | <input type="checkbox"/> | <input type="checkbox"/> | <input type="checkbox"/> | <input type="checkbox"/> |

**Remarks**

---

**4.1.16. DATA MANAGEMENT CHECK-UP**

Digital data complete and correctly archived on network drive?  Yes  No

→ If no, describe steps to be taken:  
.....  
.....

Source documents correctly archived in filing cabinet?  Yes  No

→ If no, describe steps to be taken:  
.....  
.....

**Remarks**  
.....

**4.1.17. PROTOCOL DEVIATIONS**

Were there any protocol deviations?  Yes  No

**Remarks**  
.....

**4.1.18. DEVICE DEFICIENCIES**

Were there any device deficiencies?  Yes  No

**Remarks**  
.....

**4.1.19. ADVERSE EVENTS**

Checked and acted on adverse events?  Yes  No

Any signs of tinnitus?  Yes  No

If yes, on what side(s)  Left  Right

If yes, to what extent (VAS 0-10)? Left: ..... Right: .....

Any signs of vertigo?  Yes  No

Any signs of oscillopsia?  Yes  No

**Remarks**  
.....

ELEPHANT (METC 18-028) Version: 3.2 Name investigator: \_\_\_\_\_ Signature: \_\_\_\_\_

\_\_\_\_\_

**General remarks**

\_\_\_\_\_

SUBJECT ID: \_\_\_\_\_ SEEN BY MONITOR: \_\_\_\_\_ DATE: \_\_\_\_/\_\_\_\_/\_\_\_\_

**4.2. Visit T2 (week 52)**

Date:

Bimodal user:  Yes  No, because.....

**4.2.1. TONE AUDIOMETRY**

|               |                          |                          |                          |                          |
|---------------|--------------------------|--------------------------|--------------------------|--------------------------|
|               | CI                       | HA                       | Unaided                  |                          |
| Processor/Ear | Clinical                 | Clinical                 | L                        | R                        |
| Program       | .....                    | CI off                   | CI off                   | CI off                   |
| Completed?    | <input type="checkbox"/> | <input type="checkbox"/> | <input type="checkbox"/> | <input type="checkbox"/> |

Remarks

.....

**4.2.2. SPEECH AUDIOMETRY**

|                |                          |                          |                          |                          |                          |                          |                          |                          |                          |                          |                          |                          |                          |                          |  |
|----------------|--------------------------|--------------------------|--------------------------|--------------------------|--------------------------|--------------------------|--------------------------|--------------------------|--------------------------|--------------------------|--------------------------|--------------------------|--------------------------|--------------------------|--|
|                | Test                     |                          |                          | Retest                   |                          | Test                     |                          |                          | Retest                   |                          | Test                     |                          | Retest                   |                          |  |
| Listening      | CI                       |                          |                          | CI                       |                          | HA                       |                          |                          | HA                       |                          | CIHA                     |                          | CIHA                     |                          |  |
| CI processor   | Clinical                 |                          |                          | Clinical                 |                          | CI turned off            |                          |                          |                          |                          | Clinical                 |                          | Clinical                 |                          |  |
| CI program     | .....                    |                          |                          |                          |                          | .....                    |                          |                          |                          |                          | .....                    |                          |                          |                          |  |
| HA program     | HA turned off            |                          |                          |                          |                          | Clinical fit             |                          |                          |                          |                          | Clinical fit             |                          |                          | Clinical fit             |  |
| Level (dB SPL) | 75                       | 65                       | 55                       | 65                       | 75                       | 65                       | 55                       | 65                       | 75                       | 65                       | 55                       | 65                       | 75                       | 65                       |  |
| Completed?     | <input type="checkbox"/> | <input type="checkbox"/> | <input type="checkbox"/> | <input type="checkbox"/> | <input type="checkbox"/> | <input type="checkbox"/> | <input type="checkbox"/> | <input type="checkbox"/> | <input type="checkbox"/> | <input type="checkbox"/> | <input type="checkbox"/> | <input type="checkbox"/> | <input type="checkbox"/> | <input type="checkbox"/> |  |

Remarks

.....

**BREAK**

**4.2.3. QUESTIONNAIRES**

|              |                          |
|--------------|--------------------------|
|              | Returned and checked     |
| Date         | ...../...../.....        |
| SSQ-12 (I07) | <input type="checkbox"/> |

SUBJECT ID: \_\_\_\_\_ SEEN BY MONITOR: \_\_\_\_\_ DATE: \_\_\_\_/\_\_\_\_/\_\_\_\_



|                                 |                          |
|---------------------------------|--------------------------|
| HUI-3 (I08)                     | <input type="checkbox"/> |
| ICECAP-A (09)                   | <input type="checkbox"/> |
| Sound quality descriptors (I11) | <input type="checkbox"/> |

**Remarks**

\_\_\_\_\_

**4.2.4. MATRIX IN QUIET**

|              | Practice                 |                          | Test                     | Retest                   |
|--------------|--------------------------|--------------------------|--------------------------|--------------------------|
| Listening    | CI                       |                          | CI                       | CI                       |
| CI processor | Clinical program         |                          | Clinical program         | Clinical program         |
| CI program   | .....                    |                          | .....                    |                          |
| HA program   | HA turned off            |                          |                          |                          |
| N sentences  | 10                       | 10                       | 10                       | 10                       |
| Word list nr | .....                    | .....                    | .....                    | .....                    |
| Order        | 1                        |                          | 2                        | 3                        |
| Completed?   | <input type="checkbox"/> | <input type="checkbox"/> | <input type="checkbox"/> | <input type="checkbox"/> |

**Remarks**

\_\_\_\_\_

**4.2.5. MATRIX IN NOISE**

|                                       | Practice                 |       | Test                     | Retest                   | Test                     | Retest                   |
|---------------------------------------|--------------------------|-------|--------------------------|--------------------------|--------------------------|--------------------------|
| Listening                             | CI / CIHA                |       | CI                       | CI                       | CIHA                     | CIHA                     |
| CI processor                          | Clinical                 |       | Clinical                 | Clinical                 | Clinical                 | Clinical                 |
| CI program                            | .....                    |       | .....                    |                          | .....                    |                          |
| HA program                            | Off / clinical           |       | HA turned off            |                          | Clinical                 | Clinical                 |
| N sentences                           | 10                       | 10    | 10                       | 10                       | 10                       | 10                       |
| Word list nr                          | ...                      | ...   | .....                    | .....                    | .....                    | .....                    |
| Order                                 | .....                    |       | .....                    | .....                    | .....                    | .....                    |
| Completed?                            | <input type="checkbox"/> |       | <input type="checkbox"/> | <input type="checkbox"/> | <input type="checkbox"/> | <input type="checkbox"/> |
| <b>Test result</b> (SRT in dB SNR)    | .....                    | ..... | .....                    | .....                    | .....                    | .....                    |
| <b>Mean result</b><br>(SRT in dB SNR) |                          |       | .....                    |                          | .....                    |                          |

**Remarks**  
 \_\_\_\_\_

**4.2.6. LISTENING EFFORT**

|                       | Practice                 | Test                     | Test                     |
|-----------------------|--------------------------|--------------------------|--------------------------|
| Listening             | CI / CIHA                | CI                       | CIHA                     |
| CI processor          | Clinical program         | Clinical program         | Clinical program         |
| CI program            | .....                    | .....                    | .....                    |
| HA program            | Off / clinical program   | HA turned off            | Clinical program         |
| SRT input (in dB SNR) | .....<br>.....           | .....<br>.....           | .....<br>.....           |
| Order                 | .....                    | .....                    | .....                    |
| Completed?            | <input type="checkbox"/> | <input type="checkbox"/> | <input type="checkbox"/> |

**Remarks**

.....

**BREAK**

**4.2.7. PREFERENCE SCALES**

Preference scales (i04 + i06) completed?  Yes  No

**4.2.8. FITTING**

Particularities from previous fitting to be taken into account?  No  Yes, .....

.....

Fitting form (i02) completed?  Yes  No

CI research processor given back and stored?  Yes  No

HA loaner given back and stored?  Yes  No

Patient informed about HA reimbursement and acted accordingly?  Yes  No

**Remarks**

.....

**4.2.9. PROTOCOL DEVIATIONS**

Were there any protocol deviations?  Yes  No

**Remarks**

.....  
.....

**4.2.10. DATA MANAGEMENT CHECK-UP**

Digital data complete and correctly archived on network drive?  Yes  No

→ If no, describe steps to be taken:

.....  
.....

Source documents correctly archived in filing cabinet?  Yes  No

→ If no, describe steps to be taken:

.....  
.....

**Remarks**

.....

**4.2.11. DEVICE DEFICIENCIES**

Were there any device deficiencies?  Yes  No

**Remarks**

.....

**4.2.12. ADVERSE EVENTS**

Checked and acted on adverse events?  Yes  No

Any signs of tinnitus?  Yes  No

If yes, on what side(s)  Left  Right

If yes, to what extent (VAS 0-10)? Left: ..... Right: .....

Any signs of vertigo?  Yes  No

Any signs of oscillopsia?  Yes  No

**Remarks**

.....

**General remarks**

\_\_\_\_\_

### End of study

Date of termination of participation in the study:

**Date:**

Did there occur early termination?  Yes  No

If yes, specify the reason of early termination.

- (Serious) adverse event
- Retraction of informed consent
- Protocol deviation
- Did not conform to inclusion criteria
- No effect of CI
- Discompliance to CI randomization scheme
- Discompliance to other study procedures

.....  
.....  
.....

## INVESTIGATOR STATEMENT

I am confident that the information supplied in this case record form is complete and accurate data. I confirm that the study was conducted in accordance with the protocol and any protocol amendments and that written informed consent was obtained prior to the study.

Principal investigator:

Principal investigator's Signature:

Date of signature (DD-MM-YYYY):

**(SERIOUS) ADVERSE EVENTS (SA/SAE)**

| Serious (see *)   | Severity                               | Relationship to study treatment                                   | Action taken regarding study intervention                                | Outcome of AE                                                                                                                                                                                          |
|-------------------|----------------------------------------|-------------------------------------------------------------------|--------------------------------------------------------------------------|--------------------------------------------------------------------------------------------------------------------------------------------------------------------------------------------------------|
| 1 = YES<br>2 = NO | 1 = MILD<br>2 = MODERATE<br>3 = SEVERE | 1 = DEFINITELY related<br>2 = POSSIBLY related<br>3 = NOT related | 1 = NONE<br>2 = DISCONTINUED Permanently<br>3 = DISCONTINUED Temporarily | 1 = RESOLVED, no sequel<br>2 = AE still PRESENT – NOT treated<br>3 = AE still PRESENT – Treated<br>4 = RESIDUAL effects present – NOT treated<br>5 = RESIDUAL effects present – Treated<br>6 = UNKNOWN |

\* Criteria for SAE: Any untoward medical occurrence that at any dose (1) results in death, (2) is life-threatening, (3) requires inpatient hospitalisation or prolongation of existing hospitalization, (4) results in persistent or significant disability incapacity or (5) is a congenital anomaly/birth defect.  
If serious = YES → complete SAE form!!!

| Nr. | Date | Adverse Event | Start date | Stop date | Serious? | Severity | Relationship | Action | Outcome | Initials + Sign |
|-----|------|---------------|------------|-----------|----------|----------|--------------|--------|---------|-----------------|
| 1.  |      |               |            |           |          |          |              |        |         |                 |
| 2.  |      |               |            |           |          |          |              |        |         |                 |
| 3.  |      |               |            |           |          |          |              |        |         |                 |
| 4.  |      |               |            |           |          |          |              |        |         |                 |
| 5.  |      |               |            |           |          |          |              |        |         |                 |
| 6.  |      |               |            |           |          |          |              |        |         |                 |
| 7.  |      |               |            |           |          |          |              |        |         |                 |

SUBJECT ID: \_\_\_\_\_ SEEN BY MONITOR: \_\_\_\_\_ DATE: \_\_\_\_/\_\_\_\_/\_\_\_\_



|     |  |  |  |  |  |  |  |  |  |  |
|-----|--|--|--|--|--|--|--|--|--|--|
| 8.  |  |  |  |  |  |  |  |  |  |  |
| 9.  |  |  |  |  |  |  |  |  |  |  |
| 10. |  |  |  |  |  |  |  |  |  |  |
| 11. |  |  |  |  |  |  |  |  |  |  |
| 12. |  |  |  |  |  |  |  |  |  |  |
| 13. |  |  |  |  |  |  |  |  |  |  |
| 14. |  |  |  |  |  |  |  |  |  |  |
| 15. |  |  |  |  |  |  |  |  |  |  |
| 16. |  |  |  |  |  |  |  |  |  |  |
| 17. |  |  |  |  |  |  |  |  |  |  |
| 18. |  |  |  |  |  |  |  |  |  |  |

**PROTOCOL DEVIATIONS**

| Nr. | Date | Deviation |
|-----|------|-----------|
| 1.  |      |           |
| 2.  |      |           |
| 3.  |      |           |
| 4.  |      |           |
| 5.  |      |           |
| 6.  |      |           |
| 7.  |      |           |
| 8.  |      |           |
| 9.  |      |           |
| 10. |      |           |
| 11. |      |           |

SUBJECT ID: \_\_\_\_\_ SEEN BY MONITOR: \_\_\_\_\_ DATE: \_\_\_\_/\_\_\_\_/\_\_\_\_

**PROTOCOL DEVIATIONS**

| Nr. | Date | Deviation |
|-----|------|-----------|
| 1.  |      |           |
| 2.  |      |           |
| 3.  |      |           |
| 4.  |      |           |
| 5.  |      |           |
| 6.  |      |           |
| 7.  |      |           |
| 8.  |      |           |
| 9.  |      |           |
| 10. |      |           |
| 11. |      |           |

SUBJECT ID: \_\_\_\_\_ SEEN BY MONITOR: \_\_\_\_\_ DATE: \_\_\_\_/\_\_\_\_/\_\_\_\_

**CHANGES IN MEDICATION USE**

| Medication | Start date of use | End date of use | Indication | Subscribed due to (S)AE? |
|------------|-------------------|-----------------|------------|--------------------------|
|            |                   |                 |            |                          |
|            |                   |                 |            |                          |
|            |                   |                 |            |                          |
|            |                   |                 |            |                          |
|            |                   |                 |            |                          |
|            |                   |                 |            |                          |
|            |                   |                 |            |                          |
|            |                   |                 |            |                          |
|            |                   |                 |            |                          |
|            |                   |                 |            |                          |

**COMPLIANCE**

See SOP Compliance for methods and fitting forms for calculations.

CI

In the table below it is shown to what extent subjects can show non-compliance to the CI randomization schedule before consequences take effect.

|                                      | <b>F4</b>     | <b>F7</b>                                                  | <b>F11</b>                                                 |
|--------------------------------------|---------------|------------------------------------------------------------|------------------------------------------------------------|
| Study continuation                   |               |                                                            |                                                            |
| Removed from per protocol population |               | When 2x >15%                                               | When 2x >15%                                               |
| Transferred to clinical care         | When >40% x 1 | When 2x >25% or >40% x 1 or 1x total usage time <360 min/d | When 2x >25% or >40% x 1 or 1x total usage time <360 min/d |

The compliance result that is calculated on visit F11, and includes the time window between F7 and F11, counts double since its time window is also double as long as compared to the results calculated on visits F4 and F7.

HA

In the table below it is shown to what extent subjects can show non-compliance before they will be removed from the HA population.

|                                 | <b>F7</b>  | <b>F14</b> |
|---------------------------------|------------|------------|
| Study continuation              |            |            |
| No bimodal testing at visit F10 | When < 25% |            |
| Removed from HA population      |            | When < 50% |

**FORMS**

| Form nr | Contents                                                           |
|---------|--------------------------------------------------------------------|
| i01     | Operation Room                                                     |
| i02     | Fitting Form                                                       |
| i03     | Preference scale for randomization phase                           |
| i03     | Preference scale for whole study period except randomization phase |
| i05     | Preference scale for bimodal phase                                 |
| i06     | Preference scale for clinical phase                                |
| i07     | SSQ questionnaire                                                  |
| i08     | HUI questionnaire                                                  |
| i09     | ICECAP questionnaire                                               |
| i10     | Sound quality questionnaire                                        |
| i11     | CI compliance form                                                 |
| i12     | HA compliance form                                                 |

SUBJECT ID: \_\_\_\_\_ SEEN BY MONITOR: \_\_\_\_\_ DATE: \_\_\_\_/\_\_\_\_/\_\_\_\_
