# Supplementary material for: Evaluating hearing performance with cochlear implants within the same patient using daily randomization and imaging-based fitting - The ELEPHANT study
Source: PubMed Central journal article supplement (PMC7310427; doi:10.1186/s13063-020-04469-x), 2020-06-23
Supplement: 13063_2020_4469_MOESM3_ESM.pdf [file 13063_2020_4469_MOESM3_ESM.pdf]

| CI                      | HA (contra)                                                                        | candidacy            | preop           | OR | ENT | FIRST PHASE         |                 |                 |                 |                 |                 |                 |                 |                 |                 |                 |                 |                 |                 |                  | SECOND PHASE     | THIRD PHASE       |                 |     |     |     |     |
|-------------------------|------------------------------------------------------------------------------------|----------------------|-----------------|----|-----|---------------------|-----------------|-----------------|-----------------|-----------------|-----------------|-----------------|-----------------|-----------------|-----------------|-----------------|-----------------|-----------------|-----------------|------------------|------------------|-------------------|-----------------|-----|-----|-----|-----|
|                         |                                                                                    |                      |                 |    |     | Daily randomization |                 |                 |                 |                 |                 |                 |                 |                 |                 | Free Choice     | Shared decision | Preferred       | Clinical fit    | Final fit        |                  |                   |                 |     |     |     |     |
|                         |                                                                                    |                      |                 |    |     | first fit           | REM             |                 |                 |                 |                 |                 |                 |                 |                 |                 |                 |                 |                 |                  | Optimize         | Choice            |                 |     |     |     |     |
| Timeline                | # visit code                                                                       | -                    | -               | -  | -   | F1                  | F2              | F3              | F4              | F5              | F6              | F7              | F8              | F9              | F10             | F11             | F12             | F13             | F14             | F15              | S1               | T1                | T2              |     |     |     |     |
|                         | # weeks                                                                            |                      |                 | -4 | -3  | 0                   | 1               | 2               | 3               | 4               | 5               | 6               | 7               | 8               | 10              | 12              | 16              | 20              | 26A             | 26B              | 30               | 34                | 52              |     |     |     |     |
|                         | # months                                                                           |                      |                 |    |     |                     |                 | 1               |                 | 1,5             |                 |                 |                 |                 | 3               |                 |                 | 6               | 6               | 7                | 8                | 12                |                 |     |     |     |     |
|                         | relative time cfr. previous visit                                                  | var                  | -1M             | -  | +9D | +4W                 | +1W             | +1W             | +1W             | +1W             | +1W             | +1W             | +1W             | +1W             | +2W             | +2W             | +4W             | +4W             |                 |                  | +6W              | +4W               | +18W            |     |     |     |     |
|                         | window cfr. previous visit                                                         | var                  | ±1M             | -  | ±3D | ±3W                 | ±5D             | ±5D             | ±5D             | ±5D             | ±5D             | ±5D             | ±5D             | ±5D             | ±1W             | ±1W             | ±2W             | ±2W             |                 |                  | ±2W              | ±2W               | ±4W             |     |     |     |     |
| Clinical rehabilitation | Audiologist (fitting CI/HA)                                                        |                      |                 |    |     | 150 <sup>1</sup>    | 75 <sup>2</sup> | 90 <sup>3</sup> | 75 <sup>2</sup> |                 | 75 <sup>2</sup> |                 |                 |                 | 60 <sup>2</sup> |                 |                 | 45 <sup>4</sup> |                 | 60 <sup>5</sup>  | 60 <sup>6</sup>  | 60 <sup>7</sup>   |                 |     |     |     |     |
|                         | Speech therapist (rehab)                                                           |                      |                 |    |     |                     | 45              | 45              | 45              | 45              | 45              | 45              | 45              | 45              | 45              | 45              |                 |                 | 60              |                  |                  |                   | 60              |     |     |     |     |
|                         | Social worker (consult)                                                            |                      |                 |    |     |                     |                 |                 |                 |                 |                 |                 |                 |                 |                 |                 |                 |                 |                 |                  |                  |                   |                 |     |     |     |     |
| Audiometry              | unaided                                                                            | Thresholds + CNC     | 20              | 20 |     | 20                  |                 |                 |                 |                 |                 |                 |                 |                 |                 |                 |                 |                 |                 | 20               |                  | 20                |                 |     |     |     |     |
|                         | HA                                                                                 | Aided thresholds     | 10 <sup>E</sup> |    |     |                     | 5 <sup>E</sup>  |                 |                 |                 |                 |                 |                 |                 |                 |                 |                 |                 |                 | 5 <sup>E</sup>   |                  | 5 <sup>D</sup>    |                 |     |     |     |     |
|                         | CI                                                                                 | Aided thresholds     |                 |    |     |                     | 10 <sup>A</sup> |                 | 10 <sup>A</sup> |                 |                 |                 |                 |                 |                 |                 |                 |                 |                 | 5 <sup>A*</sup>  |                  | 5 <sup>D</sup>    |                 |     |     |     |     |
| REM                     | HA                                                                                 | Aided                | 15              |    |     | 15                  |                 |                 |                 |                 |                 |                 |                 |                 |                 |                 |                 |                 |                 |                  |                  |                   |                 |     |     |     |     |
| Imaging                 | CT/MRI                                                                             |                      | x               |    |     |                     |                 |                 |                 |                 |                 |                 |                 |                 |                 |                 |                 |                 |                 |                  |                  |                   |                 |     |     |     |     |
|                         | CBCT                                                                               |                      |                 | x  |     |                     |                 |                 |                 |                 |                 |                 |                 |                 |                 |                 |                 |                 |                 |                  |                  |                   |                 |     |     |     |     |
| CI-data                 | M-T levels                                                                         |                      |                 |    |     | 0                   | 0               | 0               |                 |                 | 0               |                 |                 |                 | 0               |                 |                 |                 |                 | 0                |                  | 0                 |                 |     |     |     |     |
|                         | Datalogging                                                                        |                      |                 |    |     | 0                   | 0               | 0               | 0               | 2               | 2               | 0               | 2               | 2               | 2               | 0               | 2               | 2               |                 | 0                |                  | 0                 |                 |     |     |     |     |
|                         | Impedances                                                                         |                      |                 | x  |     | 0                   | 0               | 0               | 2               | 2               | 0               | 2               | 2               | 2               | 0               | 2               | 2               |                 | 0               |                  | 0                | 0                 |                 |     |     |     |     |
|                         | Cross-impedances                                                                   |                      |                 | x  |     | 0                   |                 |                 |                 |                 |                 |                 |                 | 0               |                 |                 |                 |                 | 0               |                  | 0                | 0                 |                 |     |     |     |     |
|                         | ECAP                                                                               |                      |                 | x  |     | 20                  |                 |                 |                 |                 |                 |                 |                 | 20              |                 |                 |                 |                 | 20              |                  | 0                | 0                 |                 |     |     |     |     |
| Basic tests             | CI                                                                                 | CNC                  |                 |    |     | 10 <sup>A</sup>     | 10 <sup>A</sup> | 10 <sup>A</sup> | 10 <sup>A</sup> | 10 <sup>A</sup> | 10 <sup>A</sup> | 10 <sup>A</sup> | 10 <sup>A</sup> | 10 <sup>A</sup> | 10 <sup>A</sup> | 10 <sup>A</sup> | 10 <sup>A</sup> | 10 <sup>A</sup> | 10 <sup>A</sup> | 10 <sup>A</sup>  | 5 <sup>A*</sup>  | 10 <sup>C,D</sup> | 5 <sup>D</sup>  |     |     |     |     |
|                         | CI                                                                                 | Matrix quiet         |                 |    |     | 20 <sup>A</sup>     | 20 <sup>A</sup> | 20 <sup>A</sup> | 20 <sup>A</sup> | 20 <sup>A</sup> | 20 <sup>A</sup> | 20 <sup>A</sup> | 20 <sup>A</sup> | 20 <sup>A</sup> | 20 <sup>A</sup> | 20 <sup>A</sup> | 20 <sup>A</sup> | 20 <sup>A</sup> | 20 <sup>A</sup> | 20 <sup>A</sup>  | 10 <sup>A*</sup> | 20 <sup>C,D</sup> | 10 <sup>D</sup> |     |     |     |     |
|                         | CI                                                                                 | Matrix noise         |                 |    |     | 20 <sup>A</sup>     | 20 <sup>A</sup> | 20 <sup>A</sup> | 20 <sup>A</sup> | 20 <sup>A</sup> | 20 <sup>A</sup> | 20 <sup>A</sup> | 20 <sup>A</sup> | 20 <sup>A</sup> | 20 <sup>A</sup> | 20 <sup>A</sup> | 20 <sup>A</sup> | 20 <sup>A</sup> | 20 <sup>A</sup> | 20 <sup>A</sup>  | 10 <sup>A*</sup> | 20 <sup>C,D</sup> | 10 <sup>D</sup> |     |     |     |     |
|                         | HA                                                                                 | CNC                  | 15 <sup>E</sup> |    |     | 5 <sup>E</sup>      | 5 <sup>E</sup>  | 5 <sup>E</sup>  |                 |                 |                 |                 |                 | 5 <sup>E</sup>  |                 |                 |                 |                 |                 | 5 <sup>E</sup>   | 5 <sup>B</sup>   | 5 <sup>C</sup>    | 5 <sup>D</sup>  |     |     |     |     |
|                         | CIHA                                                                               | CNC                  |                 |    |     |                     | 10 <sup>A</sup> |                 |                 |                 |                 |                 |                 | 10 <sup>A</sup> |                 |                 |                 |                 |                 | 5 <sup>A*</sup>  | 5 <sup>B</sup>   | 5 <sup>C</sup>    | 5 <sup>D</sup>  |     |     |     |     |
|                         | CIHA                                                                               | Matrix noise         |                 |    |     |                     | 20 <sup>A</sup> |                 |                 |                 |                 |                 |                 | 20 <sup>A</sup> |                 |                 |                 |                 |                 | 10 <sup>A*</sup> | 10 <sup>B</sup>  | 10 <sup>C</sup>   | 10 <sup>D</sup> |     |     |     |     |
|                         | <i>Summed up estimated time basic tests</i>                                        |                      |                 |    |     | 15                  | 55              | 50              | 55              | 85              | 50              | 50              | 50              | 50              | 85              | 50              | 50              | 50              |                 | 45               |                  | 70                | 45              |     |     |     |     |
| Extended tests          | CI + CIHA                                                                          | Matrix noise spatial |                 |    |     |                     |                 |                 |                 |                 |                 |                 |                 | 80 <sup>A</sup> |                 |                 |                 |                 |                 | 40 <sup>A*</sup> | 40 <sup>B</sup>  | 40 <sup>C</sup>   |                 |     |     |     |     |
|                         | CI + CIHA                                                                          | Listening effort     |                 |    |     |                     |                 |                 | 24 <sup>A</sup> |                 |                 |                 |                 |                 |                 |                 |                 |                 |                 | 12 <sup>A*</sup> | 12 <sup>B</sup>  | 12 <sup>C</sup>   | 12 <sup>D</sup> |     |     |     |     |
|                         | CI + HA                                                                            | Loudness scaling     |                 |    |     |                     |                 |                 | 18 <sup>A</sup> |                 |                 |                 |                 |                 |                 |                 |                 |                 |                 | 12 <sup>A*</sup> | 12 <sup>B</sup>  | 12 <sup>C</sup>   |                 |     |     |     |     |
|                         | CI                                                                                 | SMRT                 |                 |    |     |                     |                 |                 | 20 <sup>A</sup> |                 |                 |                 |                 |                 |                 |                 |                 |                 |                 | 20 <sup>A*</sup> |                  | 10 <sup>C</sup>   |                 |     |     |     |     |
| Questionnaires          | SSQ-12                                                                             |                      |                 | x  |     |                     |                 |                 |                 |                 |                 |                 |                 |                 |                 |                 |                 |                 |                 | A*               |                  | C                 | D               |     |     |     |     |
|                         | HUI-3                                                                              |                      |                 | x  |     |                     |                 |                 |                 |                 |                 |                 |                 |                 |                 |                 |                 |                 |                 | A*               |                  | C                 | D               |     |     |     |     |
|                         | ICECAP-A                                                                           |                      |                 | x  |     |                     |                 |                 |                 |                 |                 |                 |                 |                 |                 |                 |                 |                 |                 | A*               |                  | C                 | D               |     |     |     |     |
|                         | Preference scales                                                                  |                      |                 |    |     | A                   | A               | A               | A               | A               | A               | A               | A               | A               | A               | A               | A               | A               | A               | A*               |                  | C                 | D               |     |     |     |     |
|                         | Sound quality                                                                      |                      |                 |    |     | A                   |                 |                 |                 |                 |                 |                 |                 |                 |                 |                 |                 |                 |                 | A*               |                  | C                 | D               |     |     |     |     |
| Compliance checks       | CI                                                                                 |                      |                 |    |     |                     |                 | x               |                 |                 |                 | x               |                 |                 |                 |                 |                 |                 |                 |                  |                  |                   |                 |     |     |     |     |
|                         | HA                                                                                 |                      |                 |    |     |                     |                 |                 |                 |                 |                 | x               |                 |                 |                 |                 |                 |                 |                 | x                |                  |                   |                 |     |     |     |     |
| Trial administration    | Adverse events                                                                     |                      |                 | x  | x   | x                   | x               | x               | x               | x               | x               | x               | x               | x               | x               | x               | x               | x               | x               | x                | x                | x                 | x               |     |     |     |     |
|                         | Extended adverse events                                                            |                      |                 |    |     | x                   |                 |                 |                 |                 |                 |                 |                 |                 |                 |                 |                 |                 |                 | x                |                  | x                 | x               |     |     |     |     |
|                         | Data management check-up                                                           |                      |                 |    |     | x                   |                 |                 |                 |                 |                 |                 |                 |                 |                 |                 |                 |                 |                 | x                |                  | x                 | x               |     |     |     |     |
|                         | Device deficiencies                                                                |                      |                 | x  | x   | x                   | x               | x               | x               | x               | x               | x               | x               | x               | x               | x               | x               | x               | x               | x                | x                | x                 | x               |     |     |     |     |
| Invoice travel expenses |                                                                                    |                      |                 |    |     |                     |                 |                 |                 |                 |                 |                 |                 |                 |                 |                 |                 |                 |                 | x                |                  |                   | x               |     |     |     |     |
|                         | Total estimated time (in minutes) per visit (excluding questionnaires and imaging) |                      |                 |    |     | 60                  | 20              | NA              | NA              | 225             | 190             | 220             | 205             | 217             | 99              | 180             | 99              | 119             | 214             | 217              | 54               | 54                | 119             | 165 | 169 | 199 | 207 |
|                         | <i>Reference time standard clinical rehabilitation</i>                             |                      |                 |    |     | 60                  | 20              | NA              | NA              | 120             | 105             | 120             | 105             | 105             | 45              | 120             | 45              | 45              | 45              | 45               | 0                | 0                 | 195             |     | 0   | 195 |     |

var = variable moment  
 extra visit (not combined with clinical visit)  
 deviant from clinical rehabilitation (e.g. additional test, visit takes more time)

| Test conditions |                                                                                                                                                      |
|-----------------|------------------------------------------------------------------------------------------------------------------------------------------------------|
| A =             | measure outcome with standard AND natural FAT (HA = bimodal fit)                                                                                     |
| A* =            | measure with preferred FAT (standard OR natural (HA = bimodal fit)                                                                                   |
| B =             | measure with HA loudness fit in acute setting (CI=preferred FAT)                                                                                     |
| C =             | measure with HA loudness fit after acclimatisation (CI=preferred FAT)                                                                                |
| D =             | measure with CI and HA in clinical fit                                                                                                               |
| E =             | <i>candidacy</i> : measure both hearing aids separately and in case of a bilateral HA user also bilateral for CNC; <i>postop</i> : measure HA contra |
| 0 =             | time included in fitting CI                                                                                                                          |

| Test                      | testing properties         | # administrations per testing property | Estimated time          |
|---------------------------|----------------------------|----------------------------------------|-------------------------|
| Thresholds                | 250-8000Hz                 | 1x                                     | 5 min per ear/condition |
| CNC                       | 55 dB, 65 dB, 75dB         | 1x (retest 65 dB)                      | 5 min per ear/condition |
| Matrix Quiet              | 65dB                       | 2x (test-retest)                       | 10 min per condition    |
| Matrix Noise              | N65dB, Svariable           | 2x (test-retest)                       | 10 min per condition    |
| Matrix noise spatial      | SONCI, SONHA               | 2x (test-retest)                       | 20 min per condition    |
| Listening effort          | 6 SNR                      | 5x per SNR                             | 6 min per condition     |
| Loudness scaling (Acalos) | 5 noise frequencies        | 1x                                     | 6 min per condition     |
| SMRT                      | Frequency selectivity test | 2x (test-retest)                       | 10 min per condition    |

| Fitting legend |                                                                                                                                                                                                                                                                                  |
|----------------|----------------------------------------------------------------------------------------------------------------------------------------------------------------------------------------------------------------------------------------------------------------------------------|
| 1              | Initial CI-fitting in week 1 according to clinical practices, including impedance measurement and determination of M-T levels, subsequently initial fitting of HA contra. In case of ipsilateral residual hearing: try-out EAS live and decide whether or not to continue study. |
| 2              | CI-fitting according to clinical practices, including impedance measurement, datalogging and determination of M-T levels, followed by fitting of HA contra                                                                                                                       |
| 3              | CI-fitting according to clinical practices, including impedance measurement, datalogging and determination of M-T levels, followed by extensive fitting of HA contra based on REM                                                                                                |
| 4              | CI evaluation fitting according to clinical practices, including impedance measurement, datalogging and determination of M-T levels, followed by evaluation of HA fitting                                                                                                        |
| 5              | HA optimization fitting, CI fitting limited to check of impedances and datalogging                                                                                                                                                                                               |
| 6              | Programming of preferred HA fitting at the end of testing, programming of preferred CI fitting with Soundwave instead of BEPS+                                                                                                                                                   |
| 7              | CI evaluation fitting according to clinical practices, including impedance measurement and datalogging, followed by evaluation of HA fitting                                                                                                                                     |
